# Supplementary material for: Whole Exome Sequencing Identifies Novel De Novo Variants Interacting with Six Gene Networks in Autism Spectrum Disorder
Source: MDPI journal article supplement (doi:10.3390/genes12010001), 2020-12-22

# AMIGO1

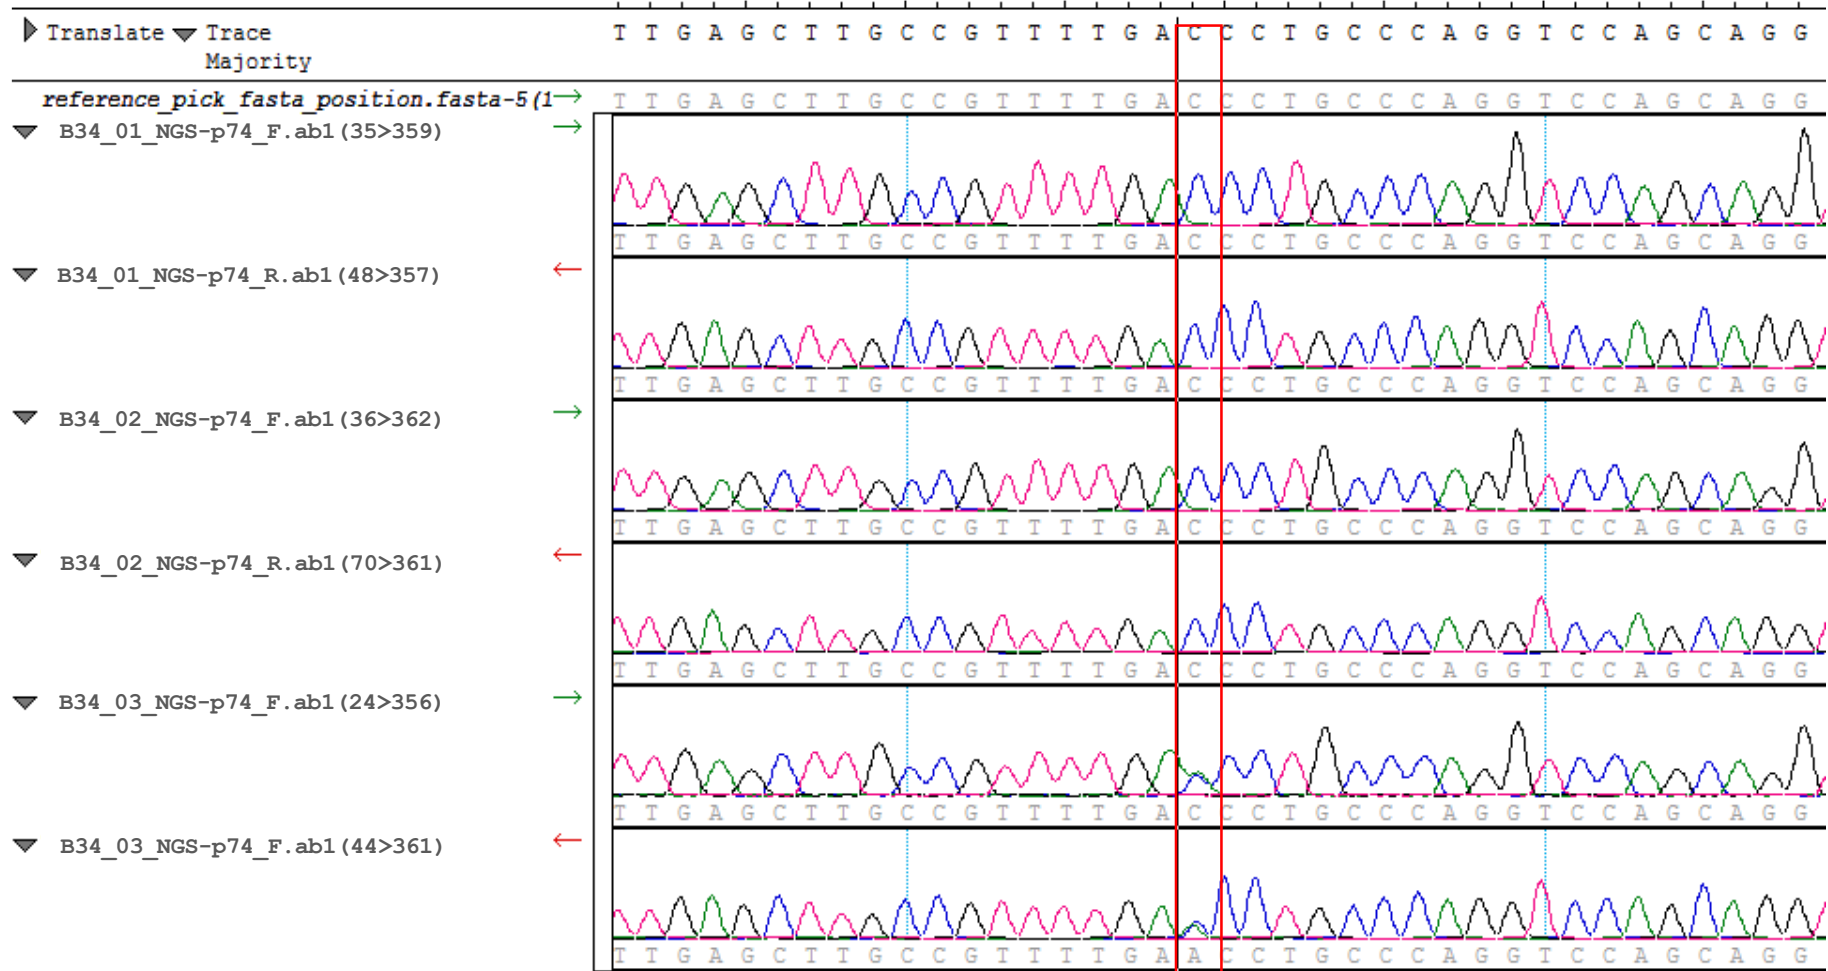

# HAX1

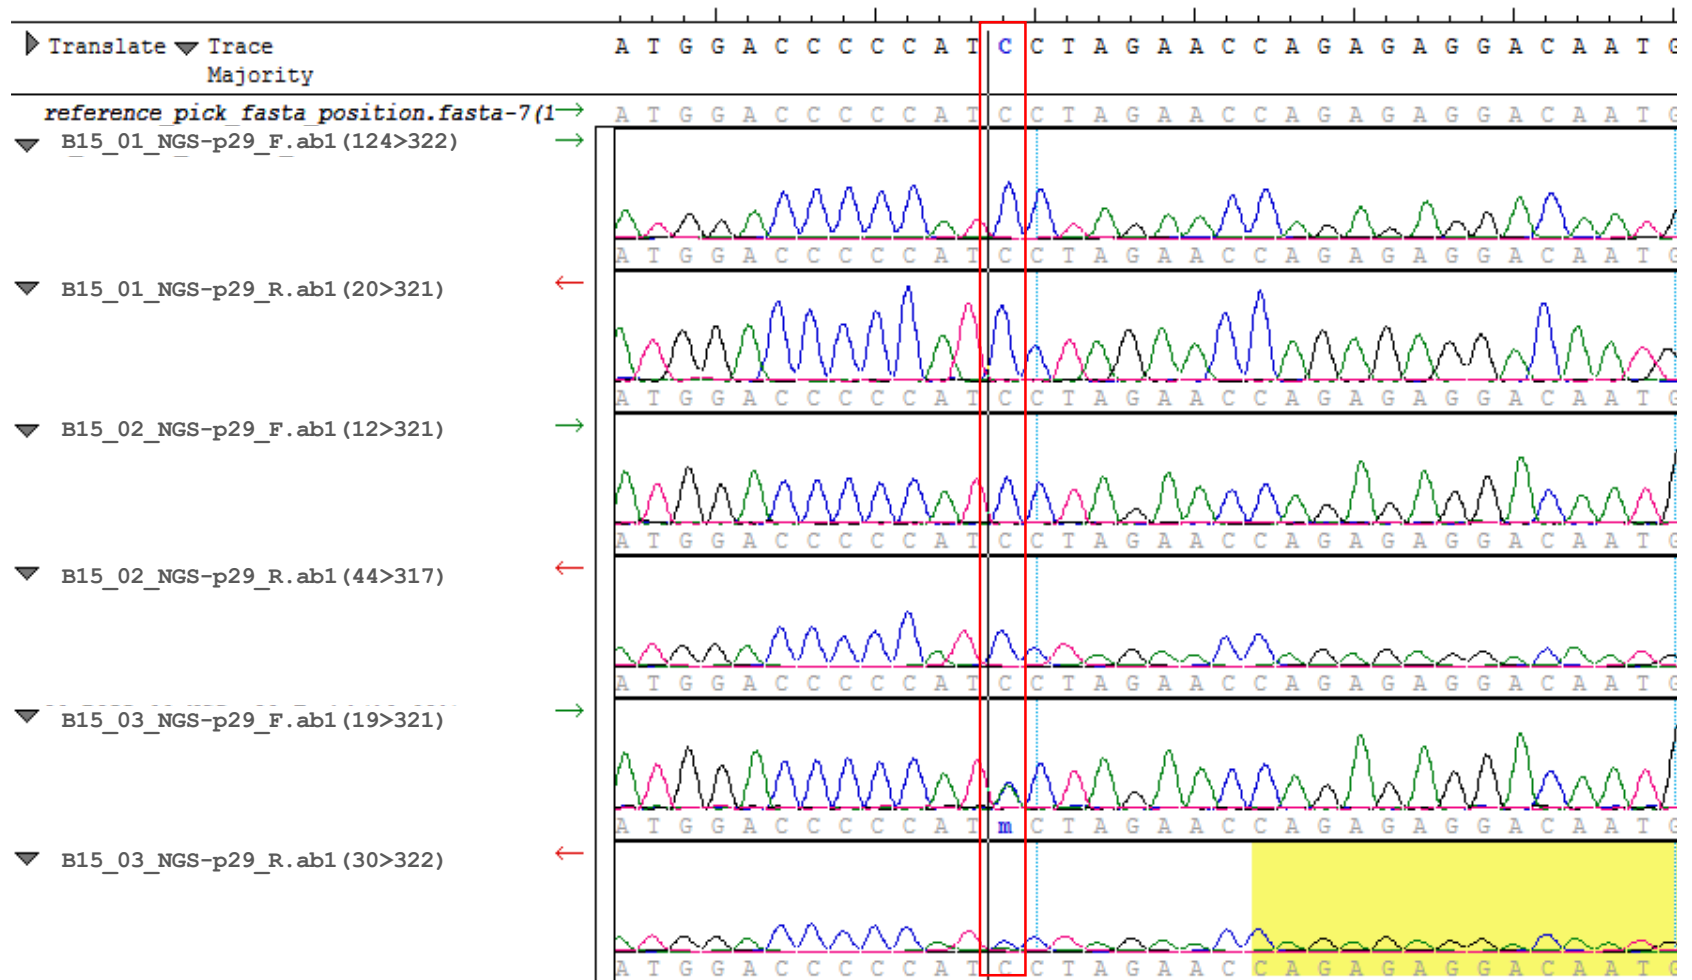

# IWS1

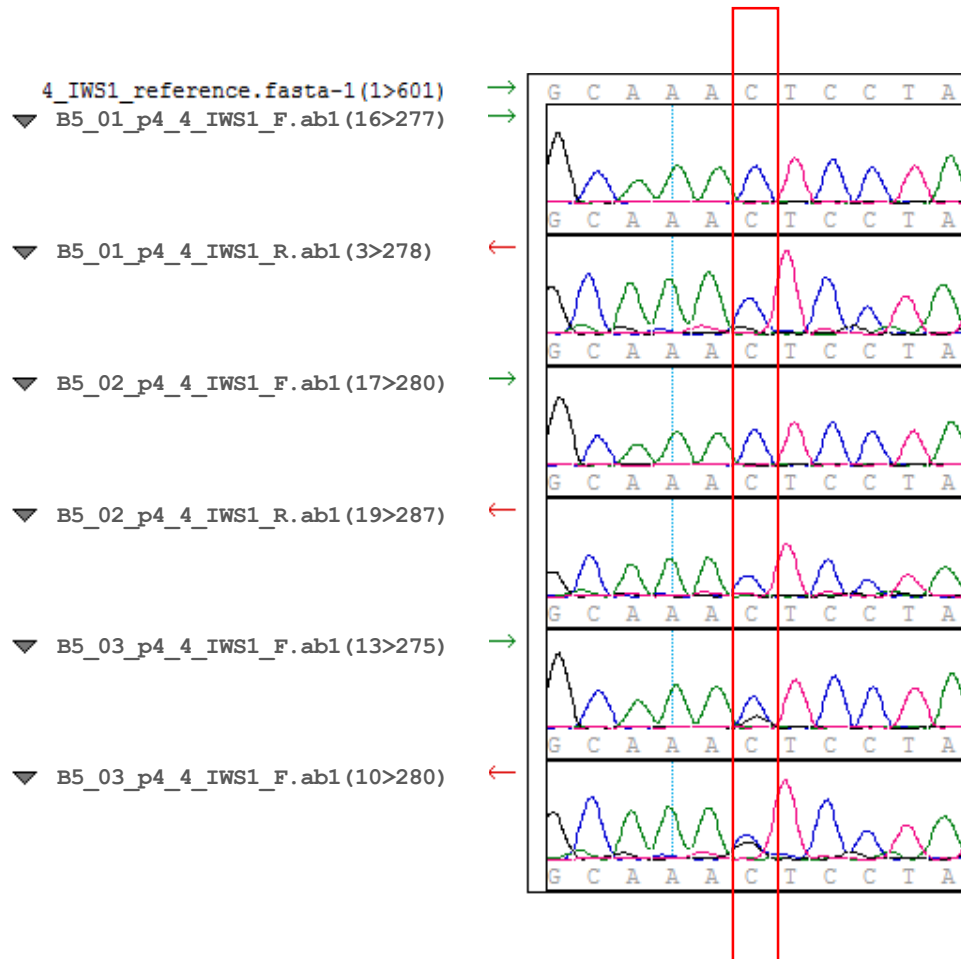

# TTC21A

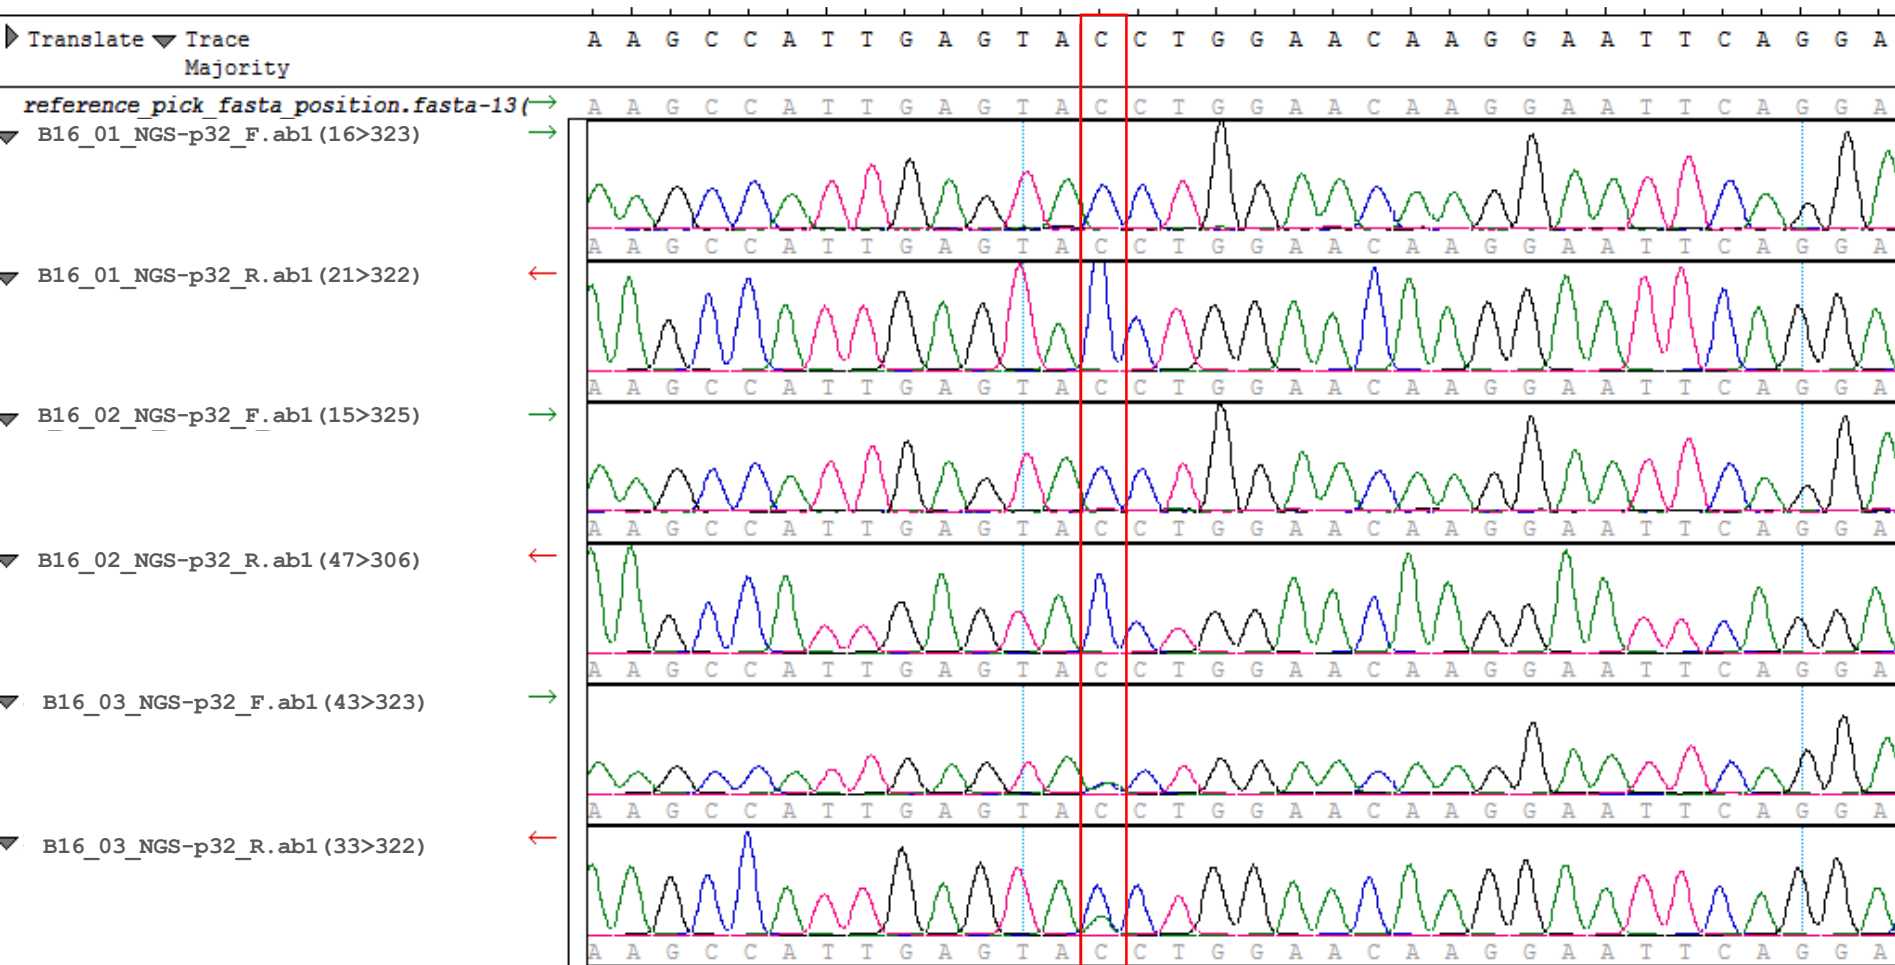

# LARS2

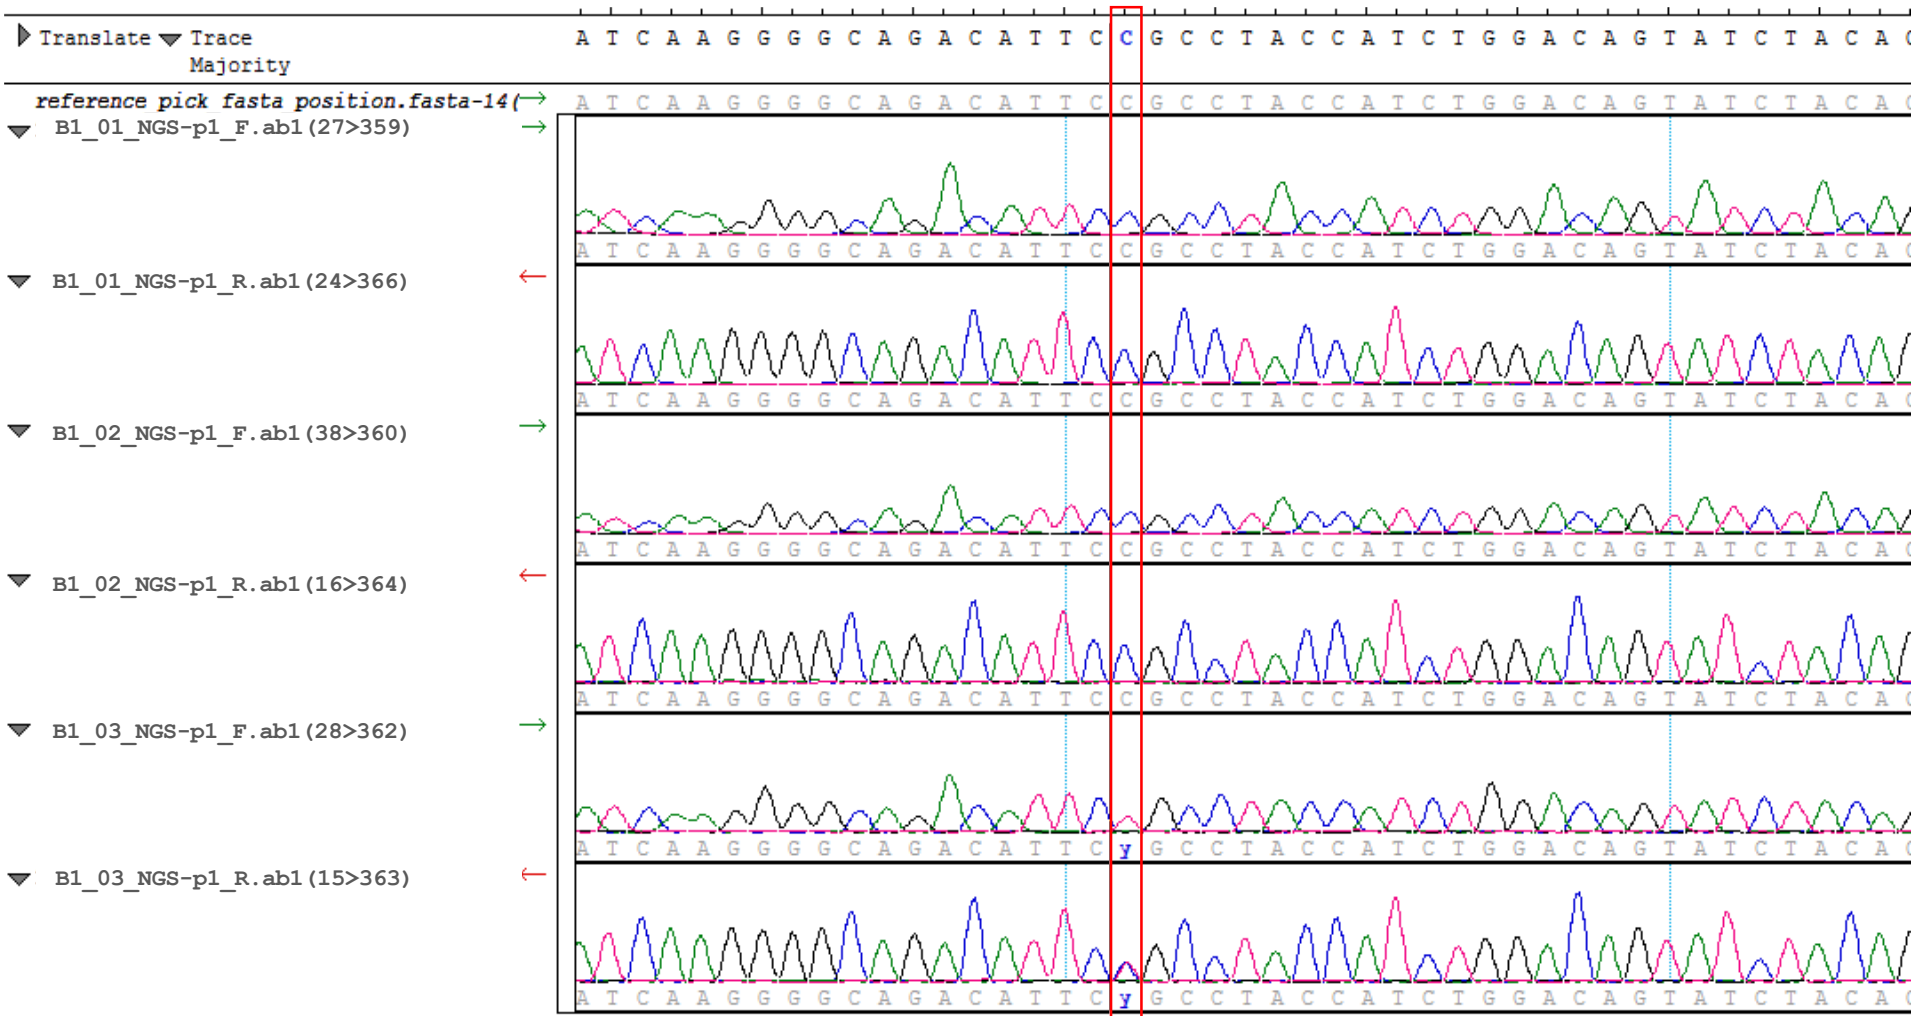

# CELSR3

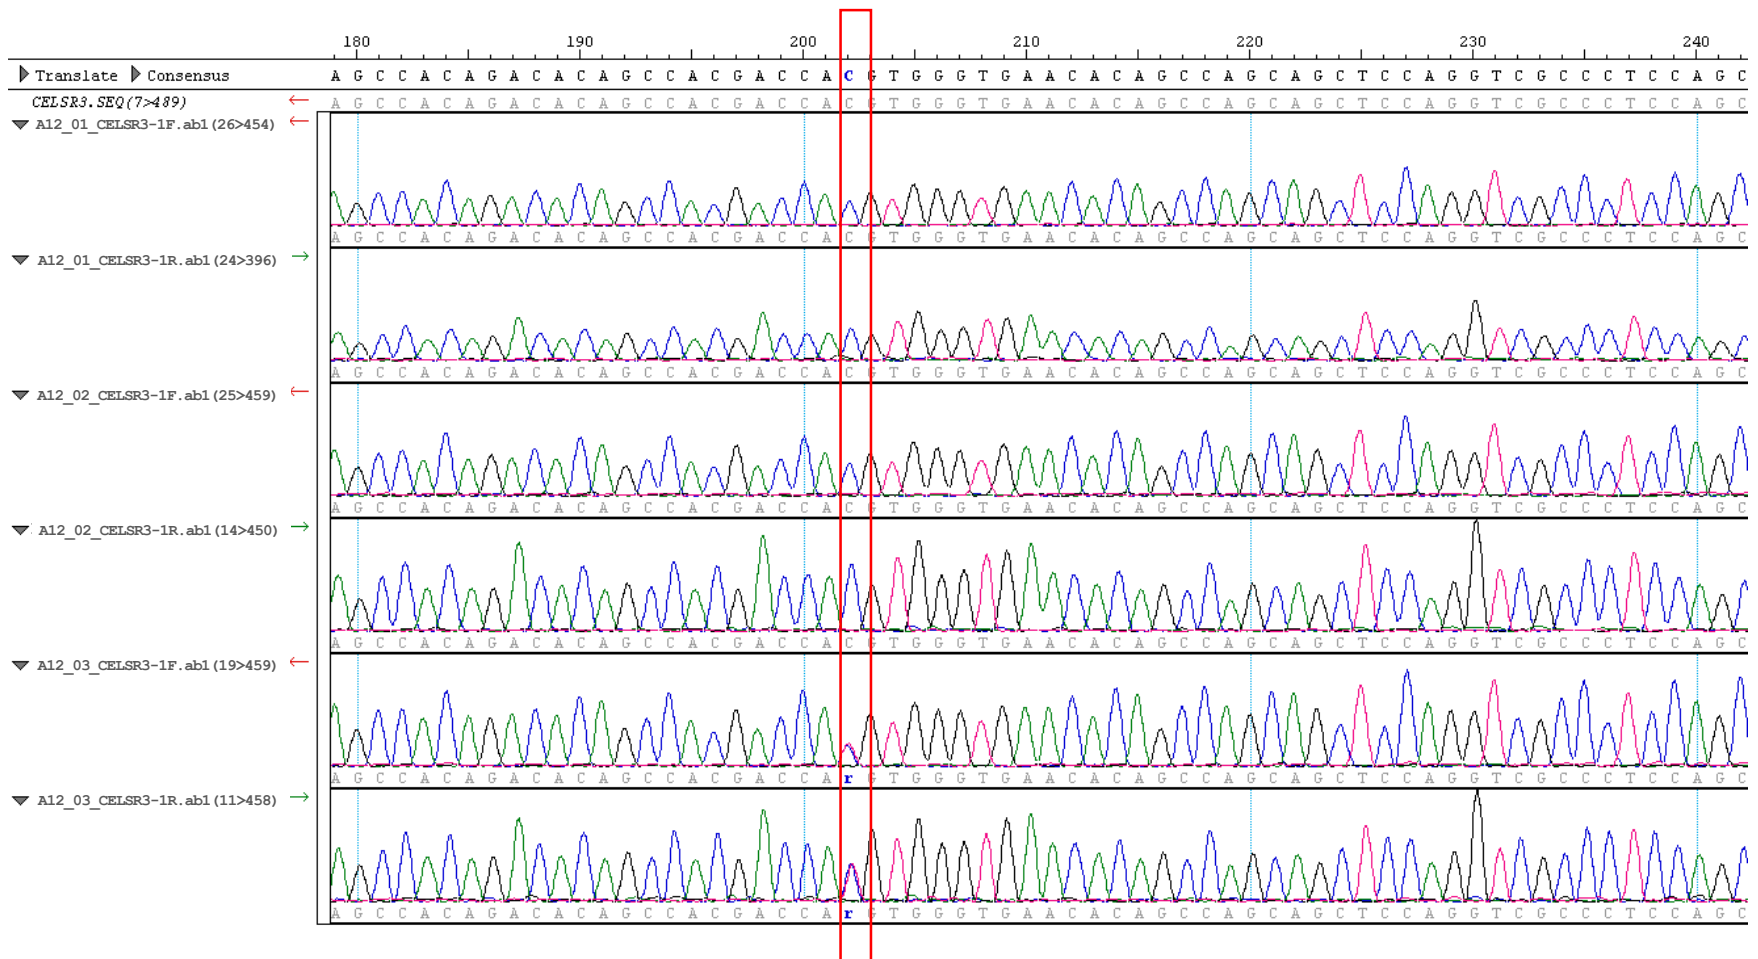

# SLC26A1

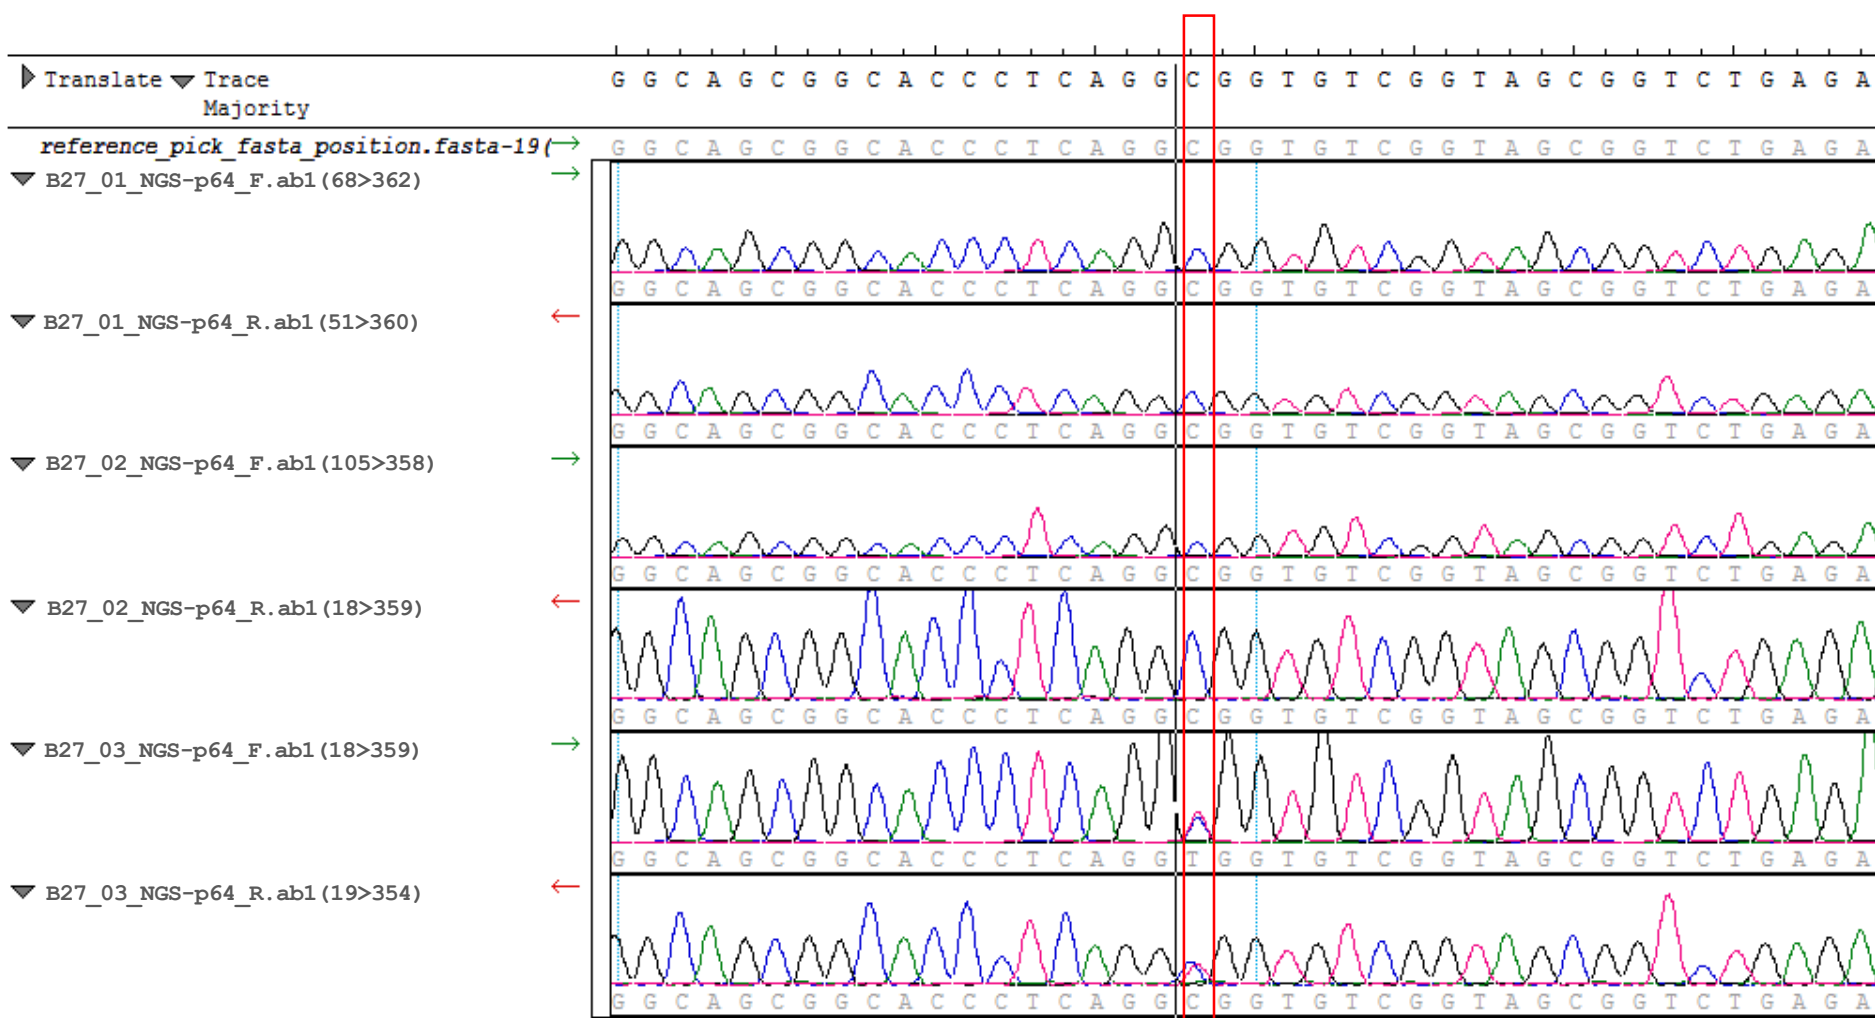

# NFKB1

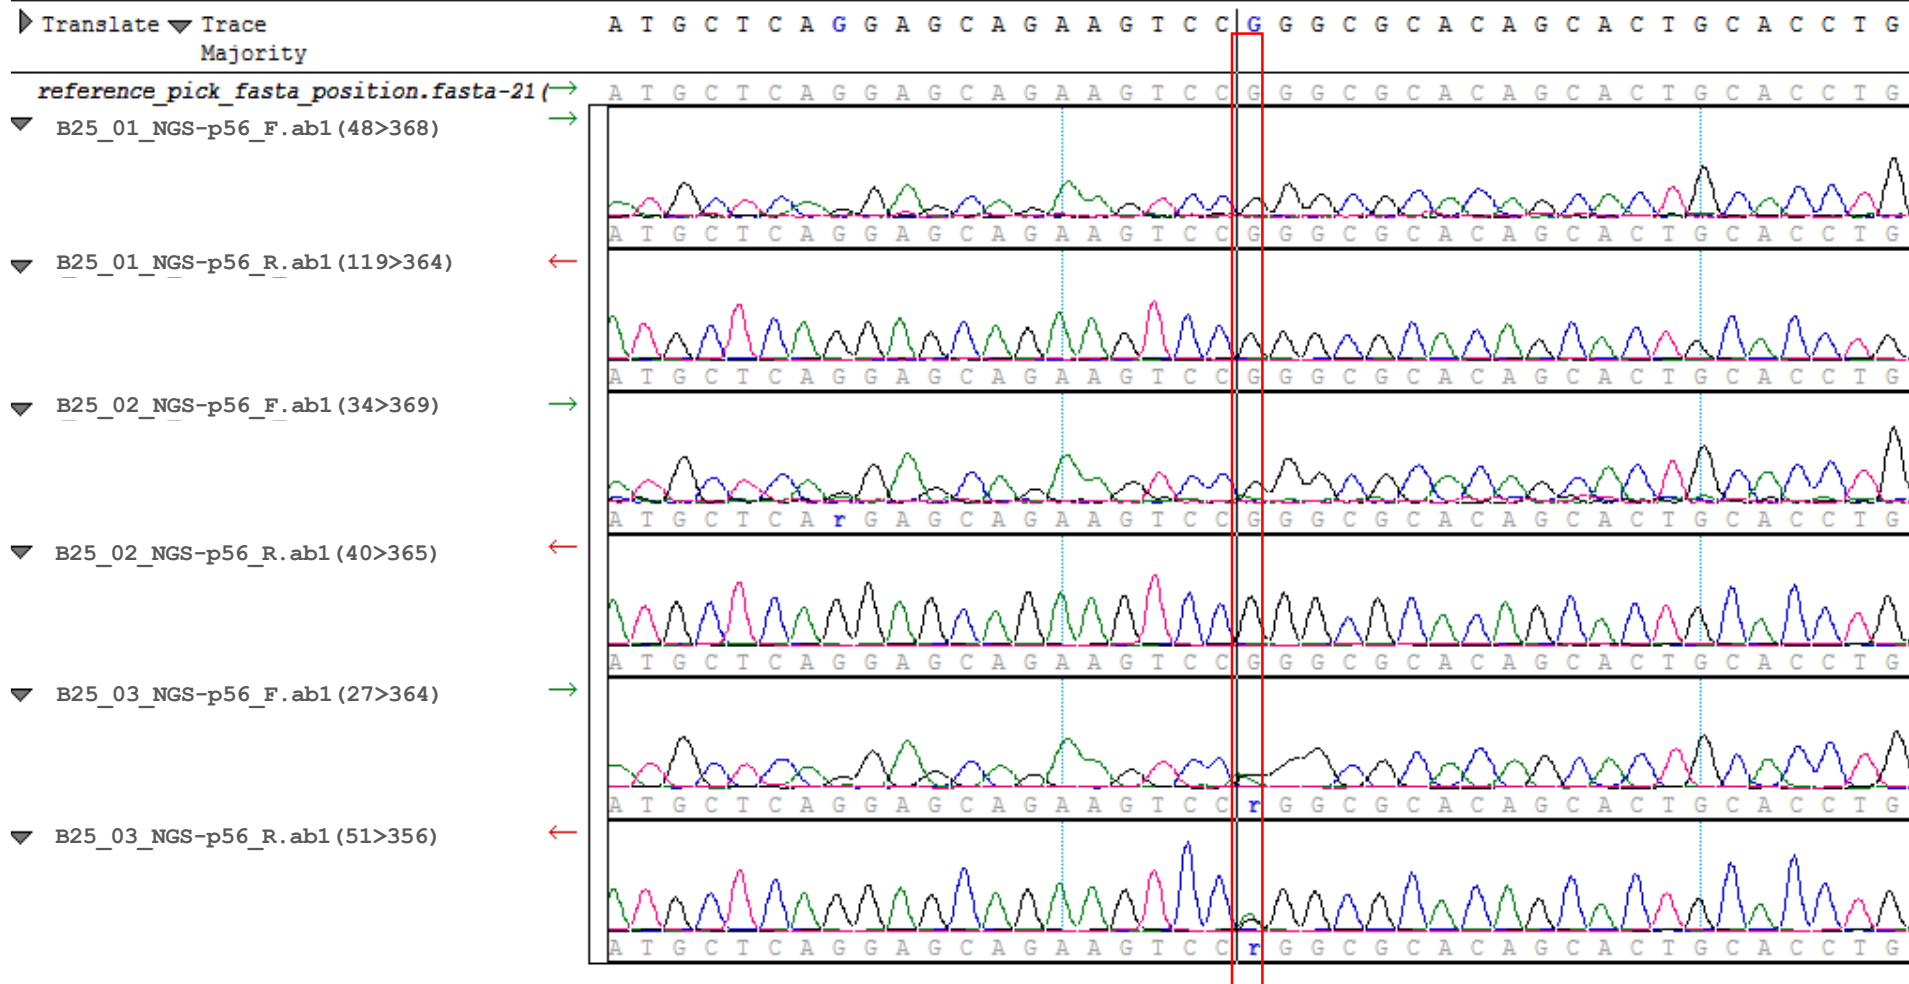



# NEK1

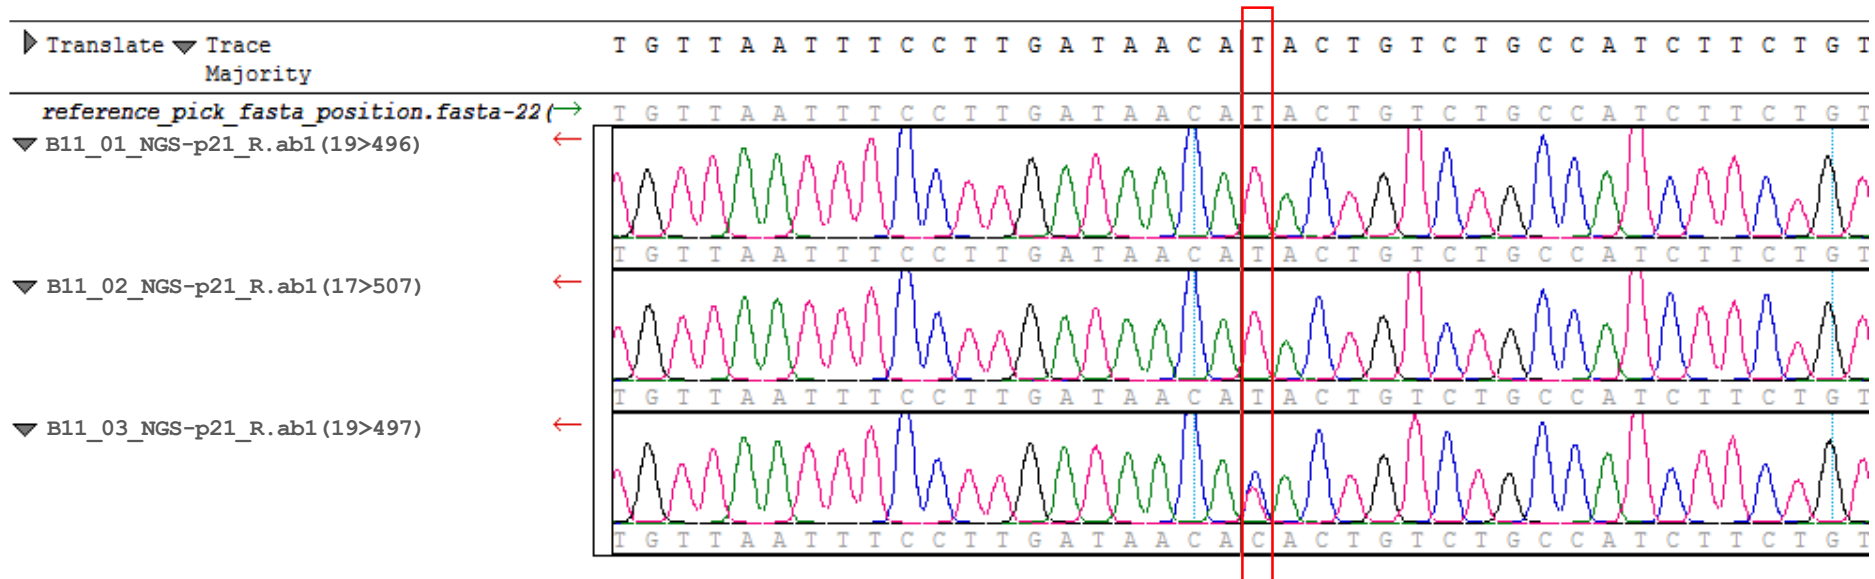

# RBM27

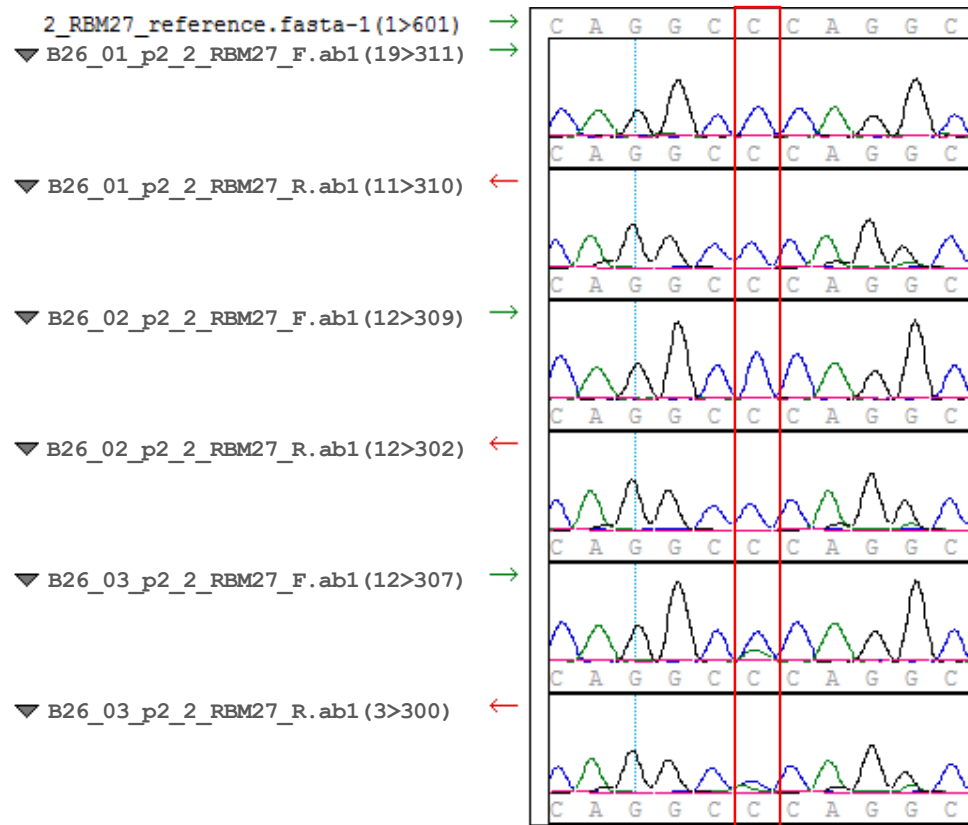

► Translate ▼ Trace  
Majority

reference\_pick\_fasta\_position.fasta-26(→ C C T T C T T C C C G T C C T G T A G C A C C A C T G C C G G A A C T G T G G C C A C A T C T T

▼ B29\_01\_NGS-p68\_F.ab1 (31>370) →  
C C T T C T T C C C G T C C T G T A G C A C C A C T G C C G G A A C T G T G G C C A C A T C T T

▼ B29\_01\_NGS-p68\_R.ab1 (35>367) ←  
C C T T C T T C C C G T C C T G T A G C A C C A C T G C C G G A A C T G T G G C C A C A T C T T

▼ B29\_02\_NGS-p68\_F.ab1 (29>371) →  
C C T T C T T C C C G T C C T G T A G C A C C A C T G C C G G A A C T G T G G C C A C A T C T T

▼ B29\_02\_NGS-p68\_R.ab1 (50>369) ←  
C C T T C T T C C C G T C C T G T A G C A C C A C T G C C G G A A C T G T G G C C A C A T C T T

▼ B29\_03\_NGS-p68\_F.ab1 (31>373) →  
C C T T C T T C C C G T C C T G T A G C A C C r C T G C C G G A A C T G T G G C C A C A T C T T

▼ B29\_03\_NGS-p68\_R.ab1 (93>364) ←  
C C T T C T T C C C G T C C T G T A G C A C C r C T G C C G G A A C T G T G G C C A C A T C T T

# ATXN1

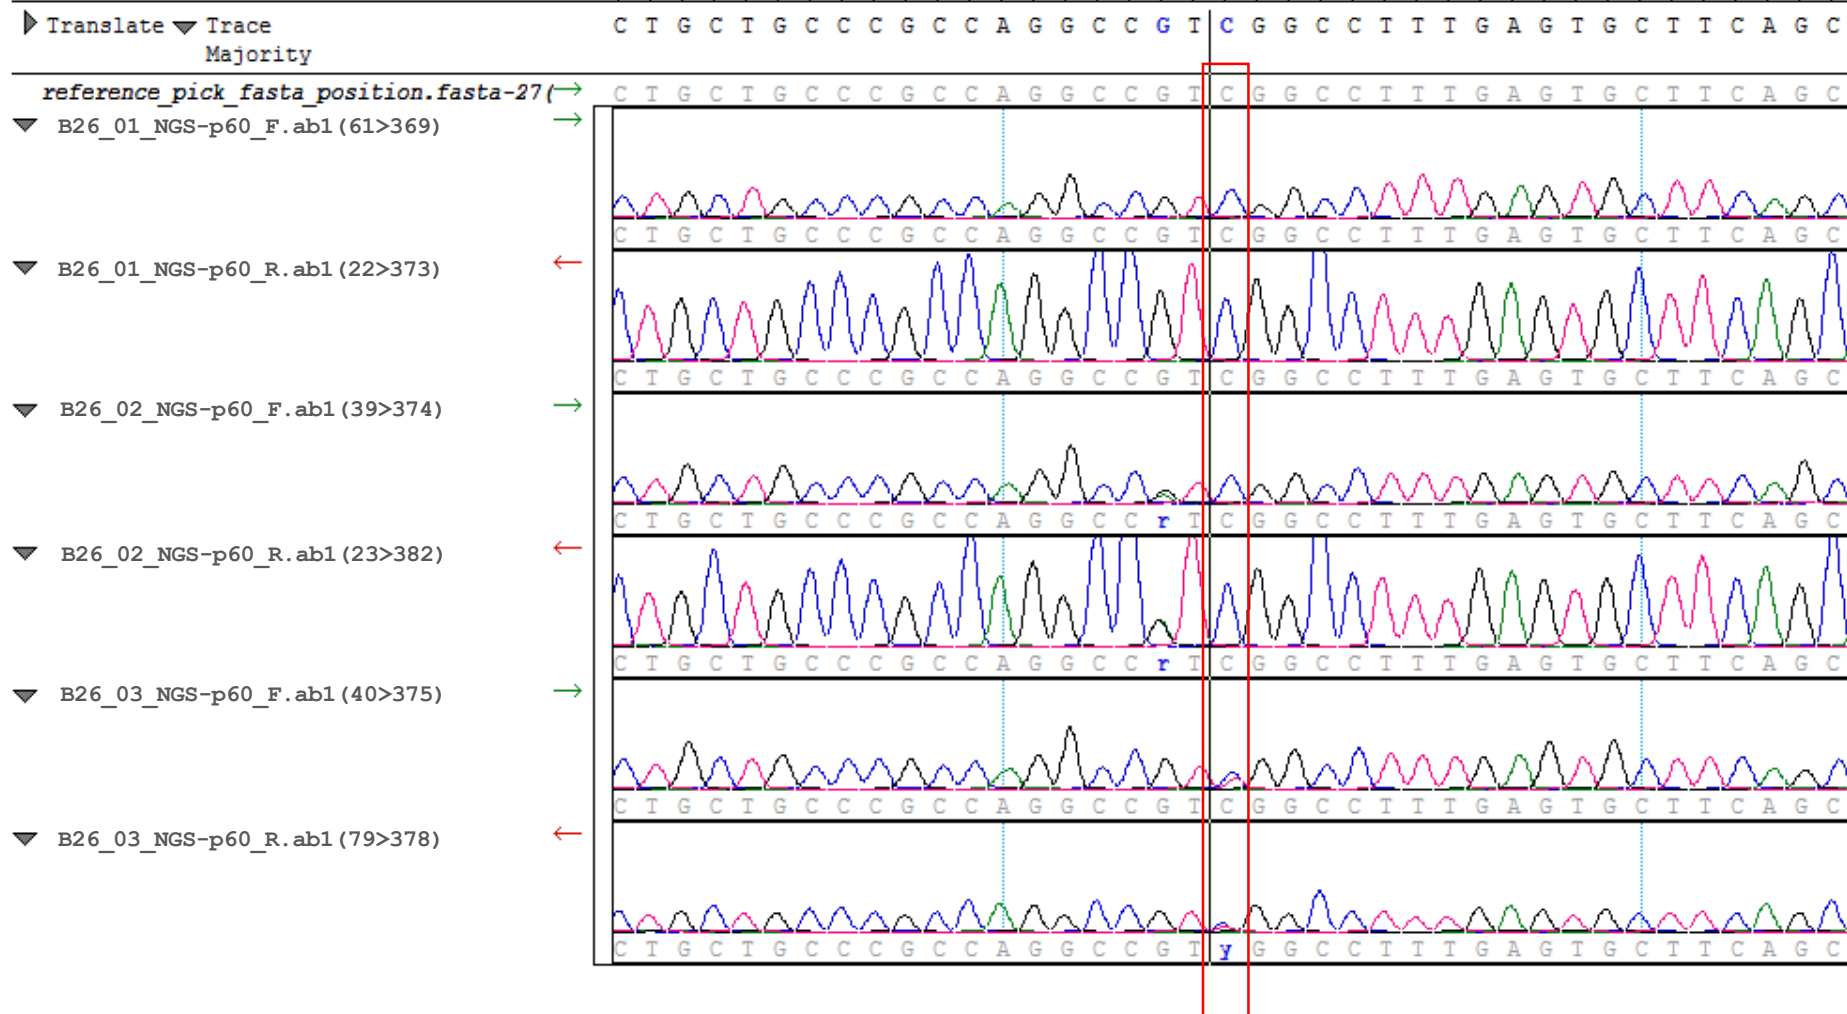

# TCTE1

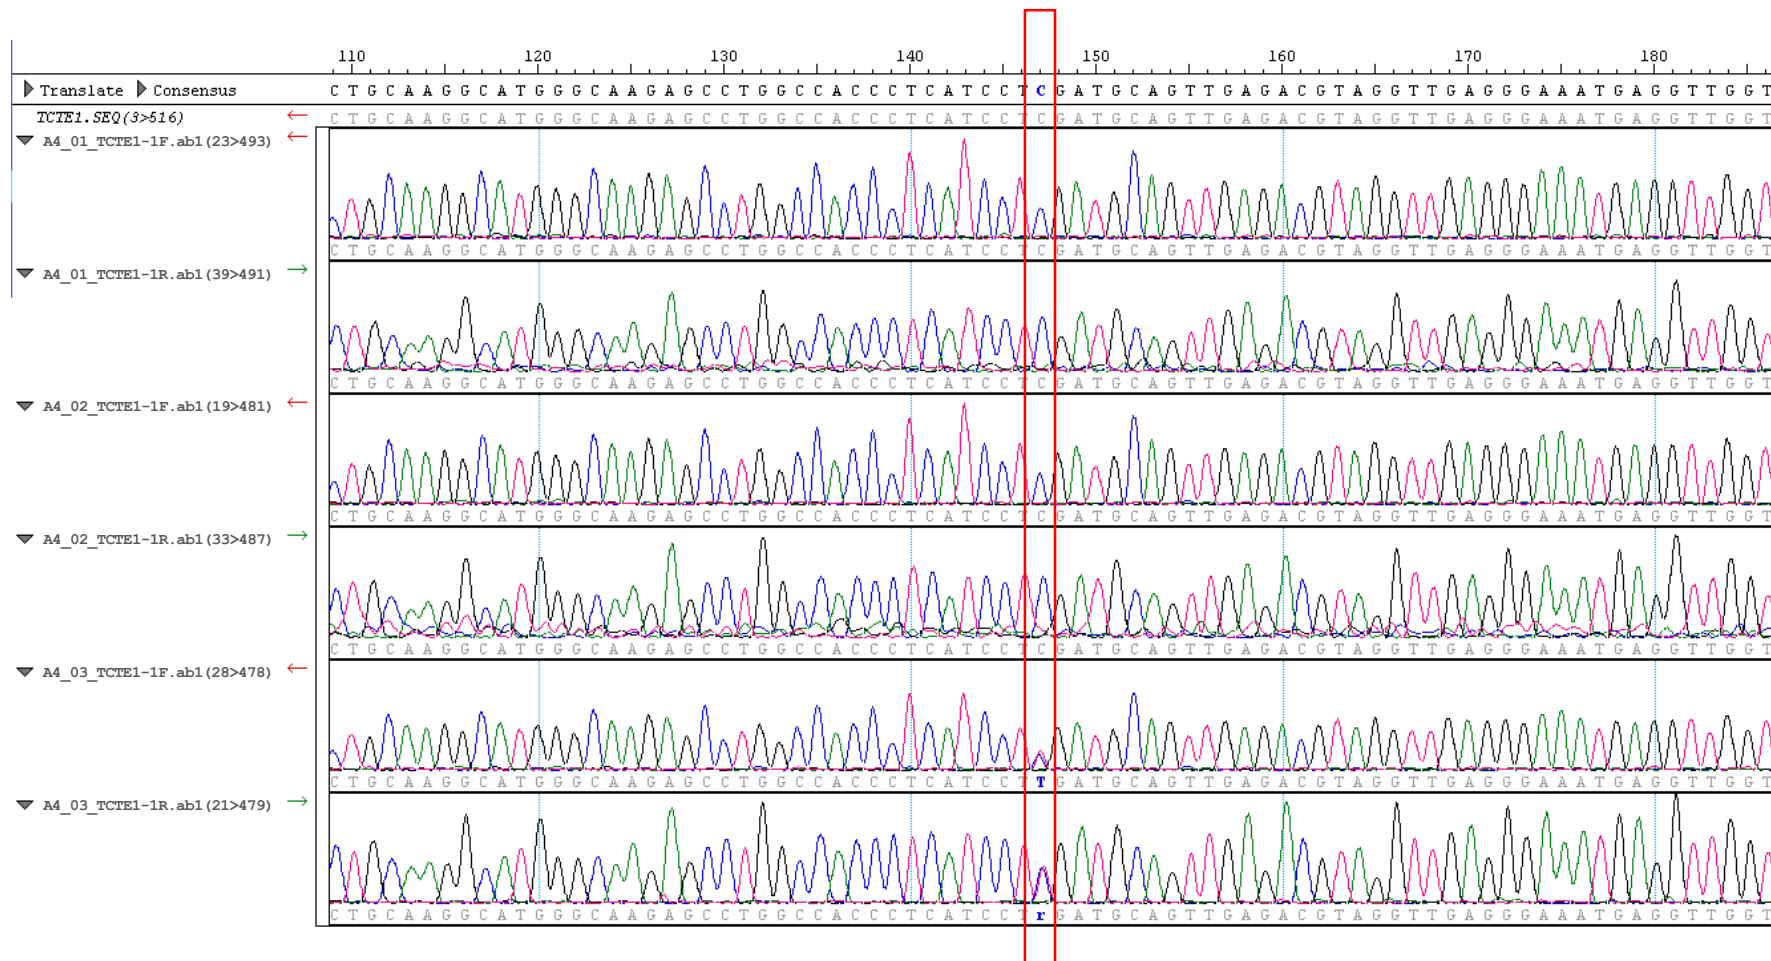

# MTUS1

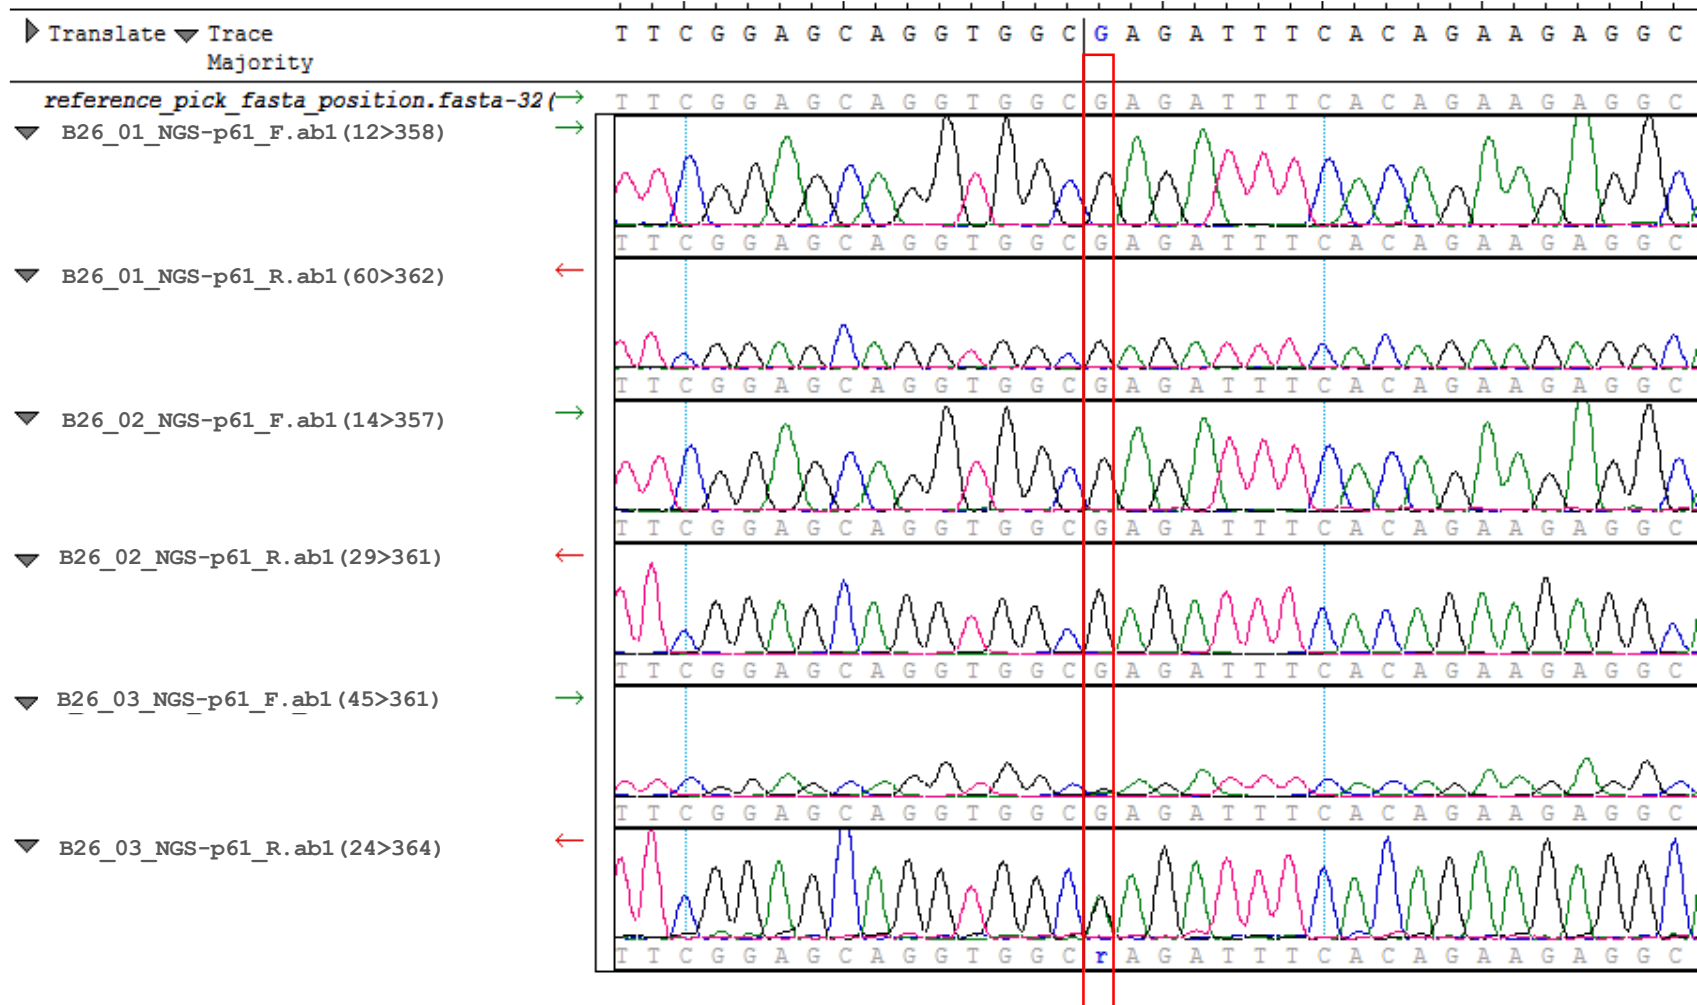

# KCTD9

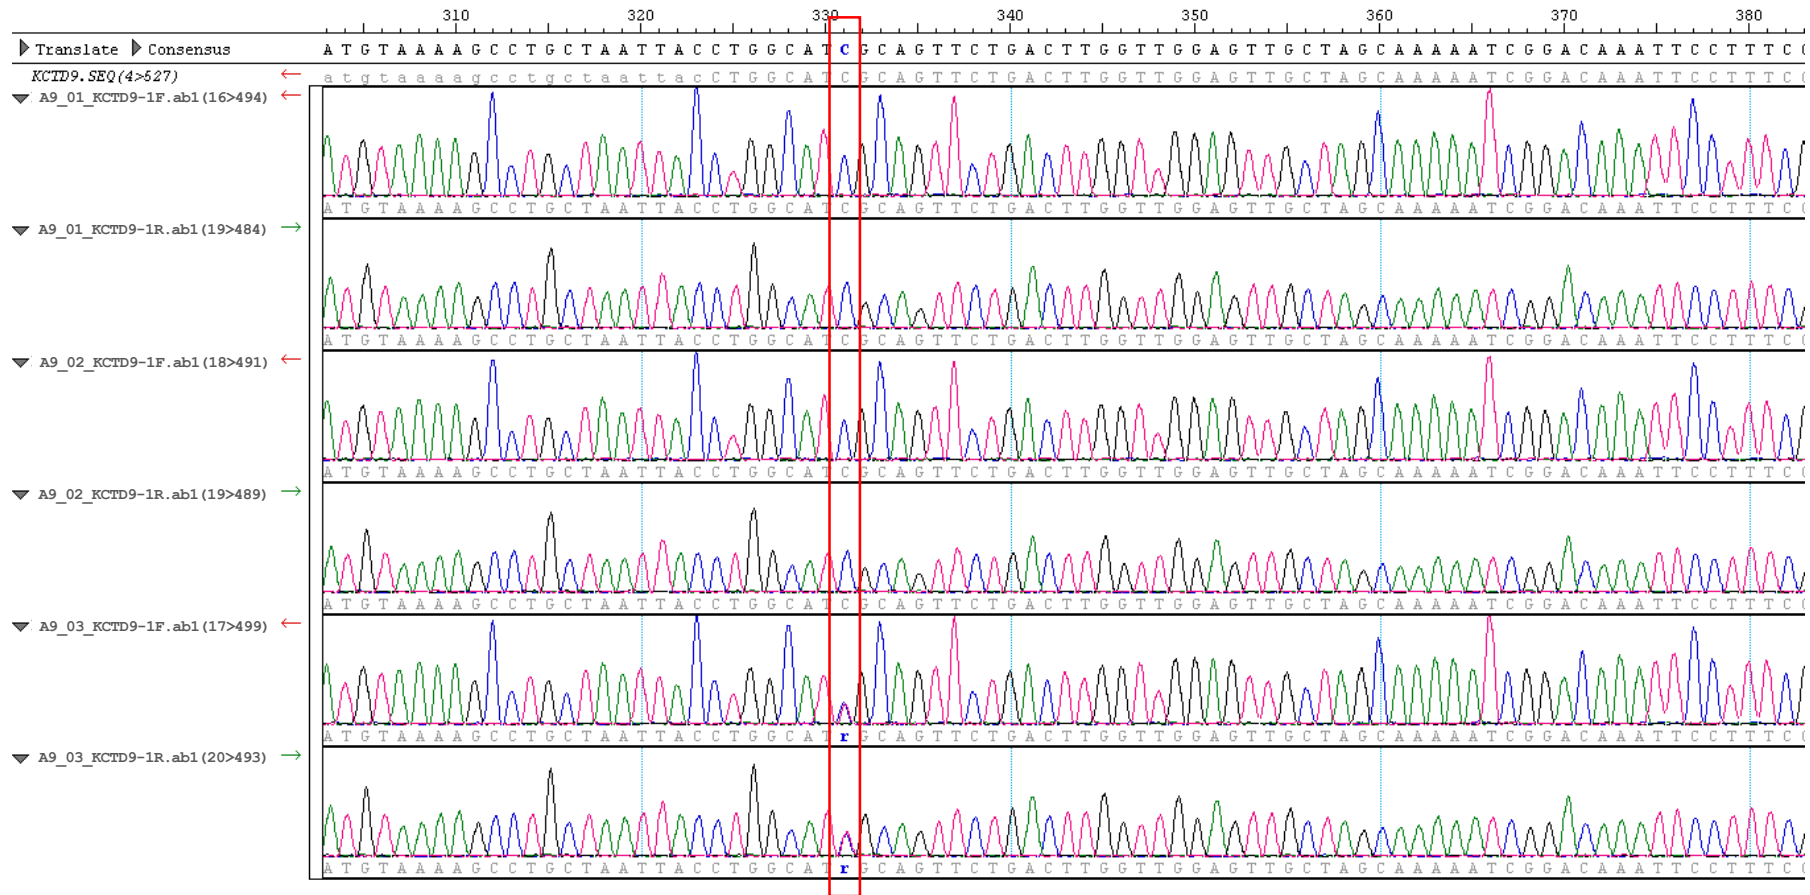

# AKNA

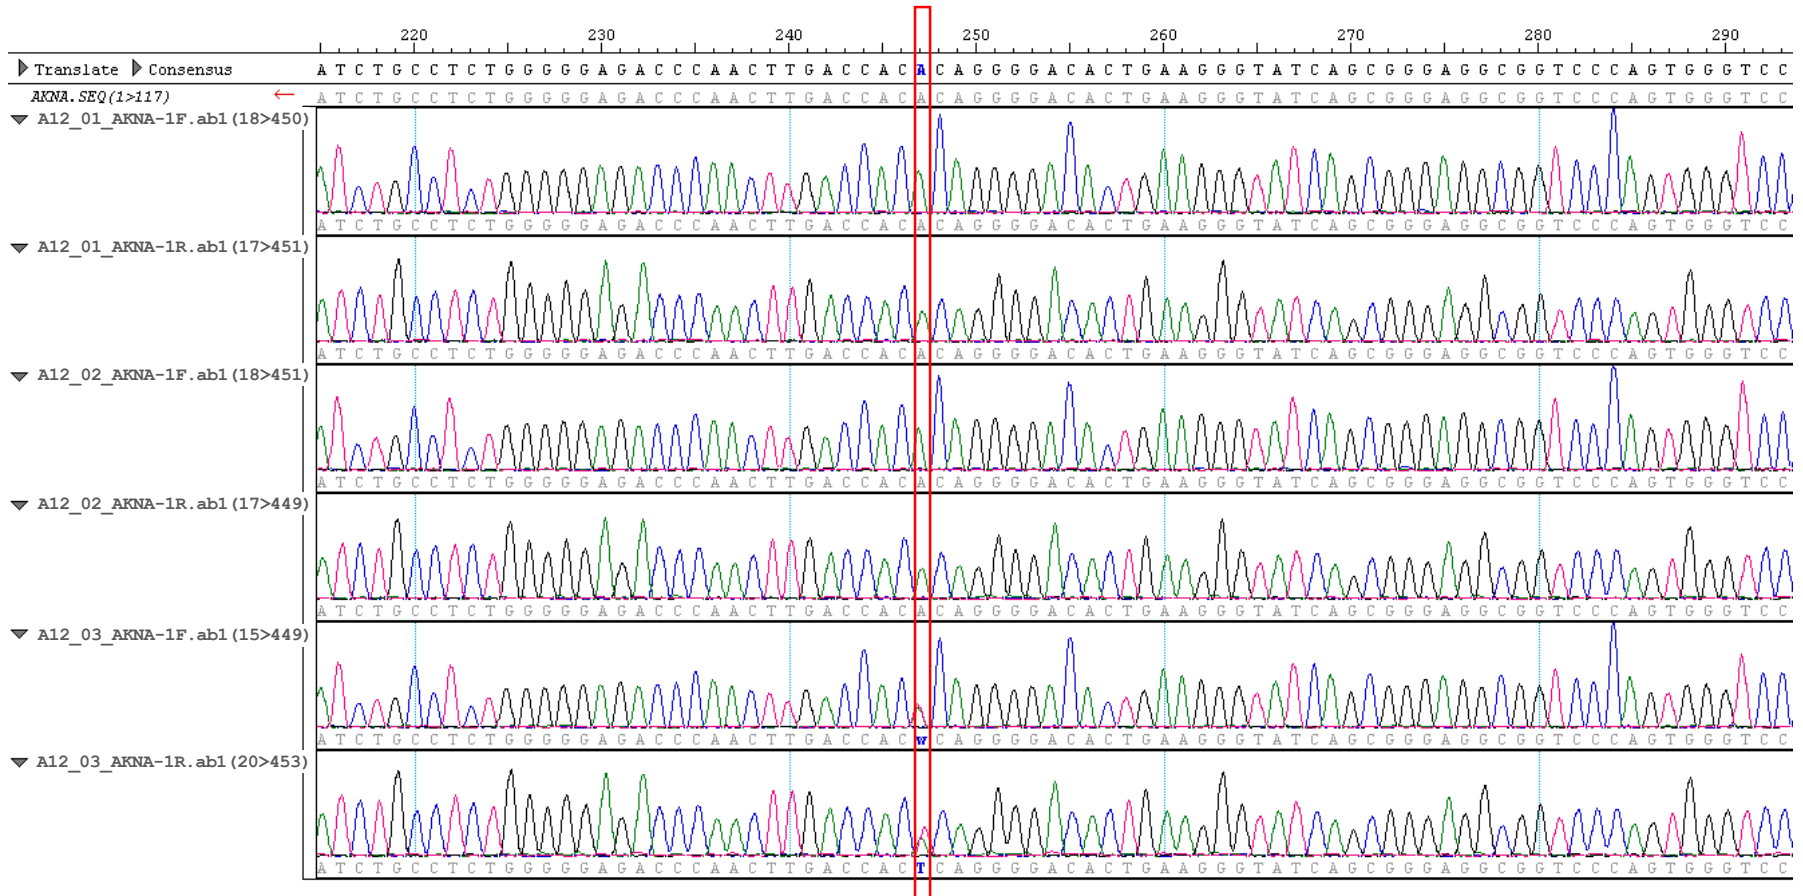



# UBAC1

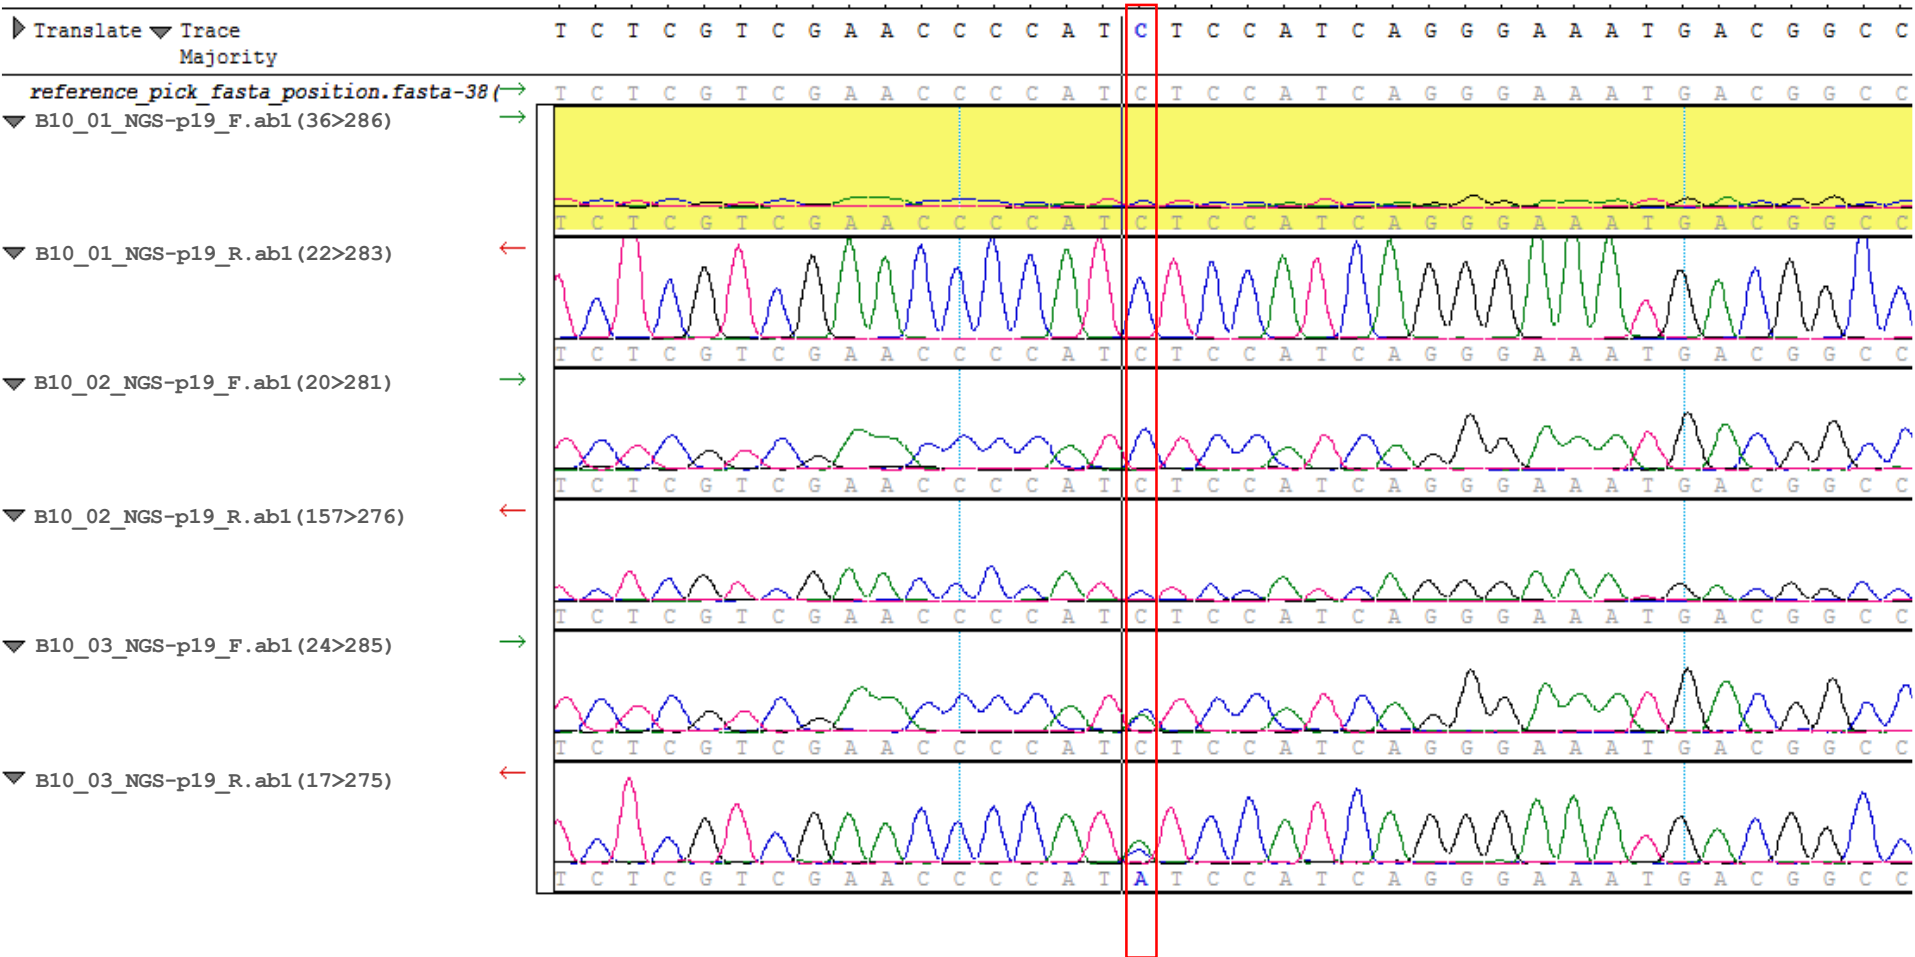

# PITRM1-AS1

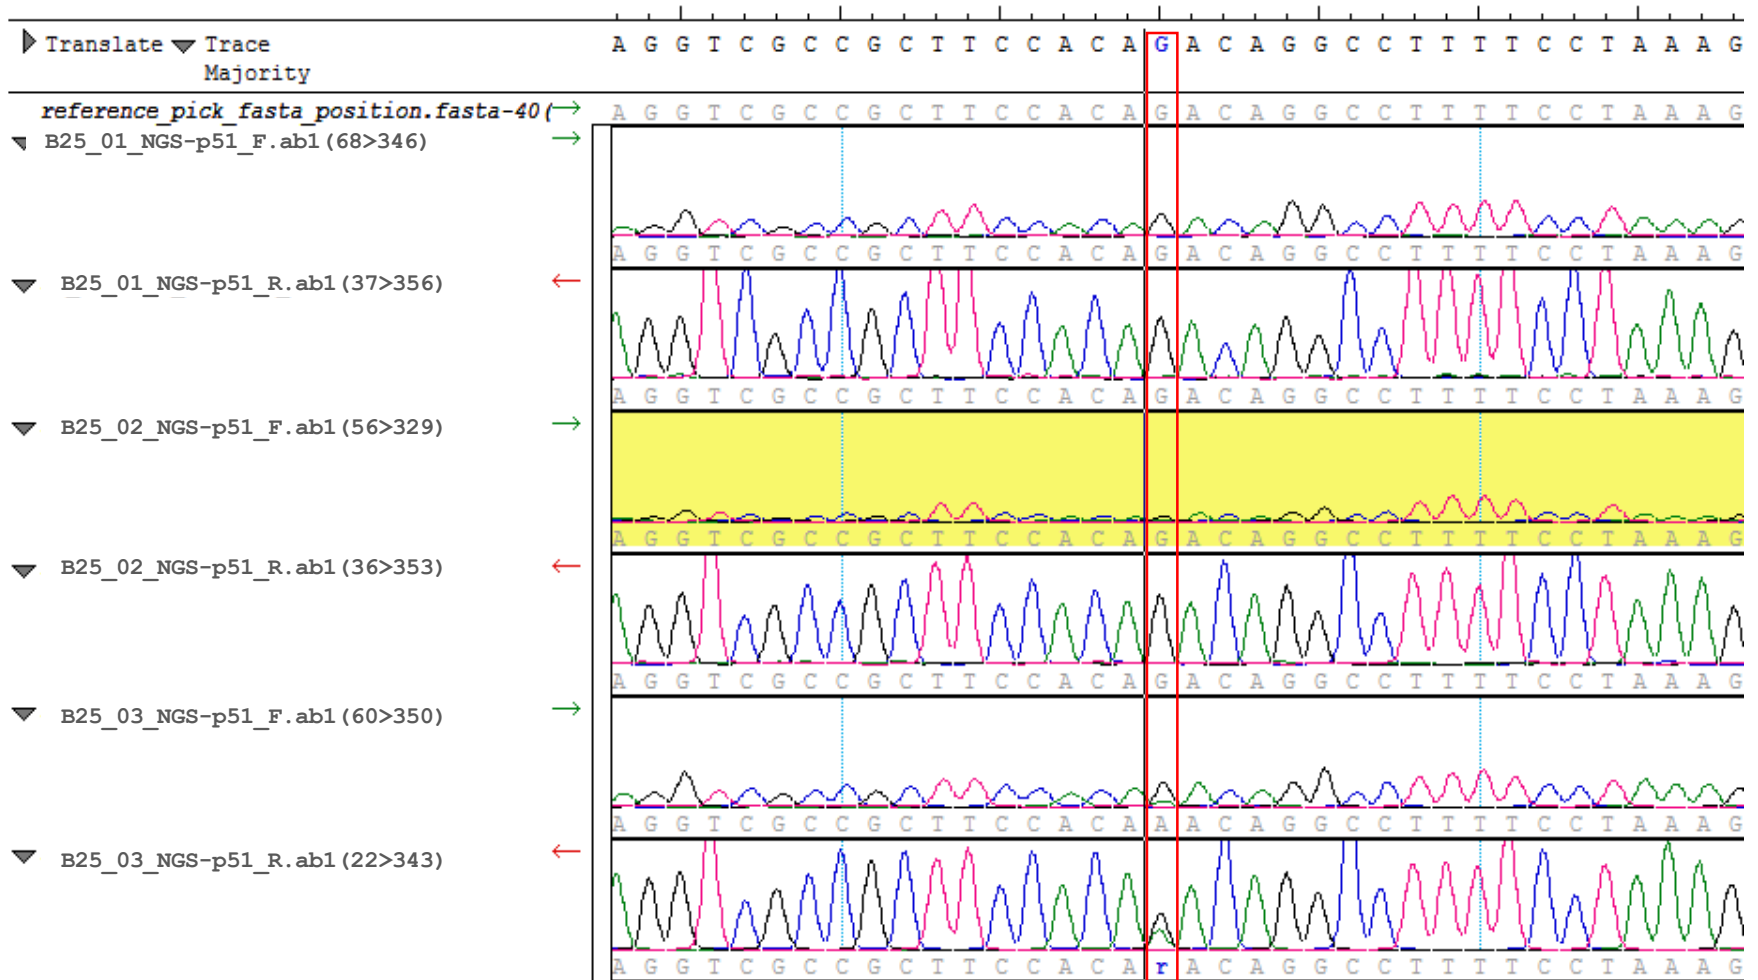

# SFMBT2

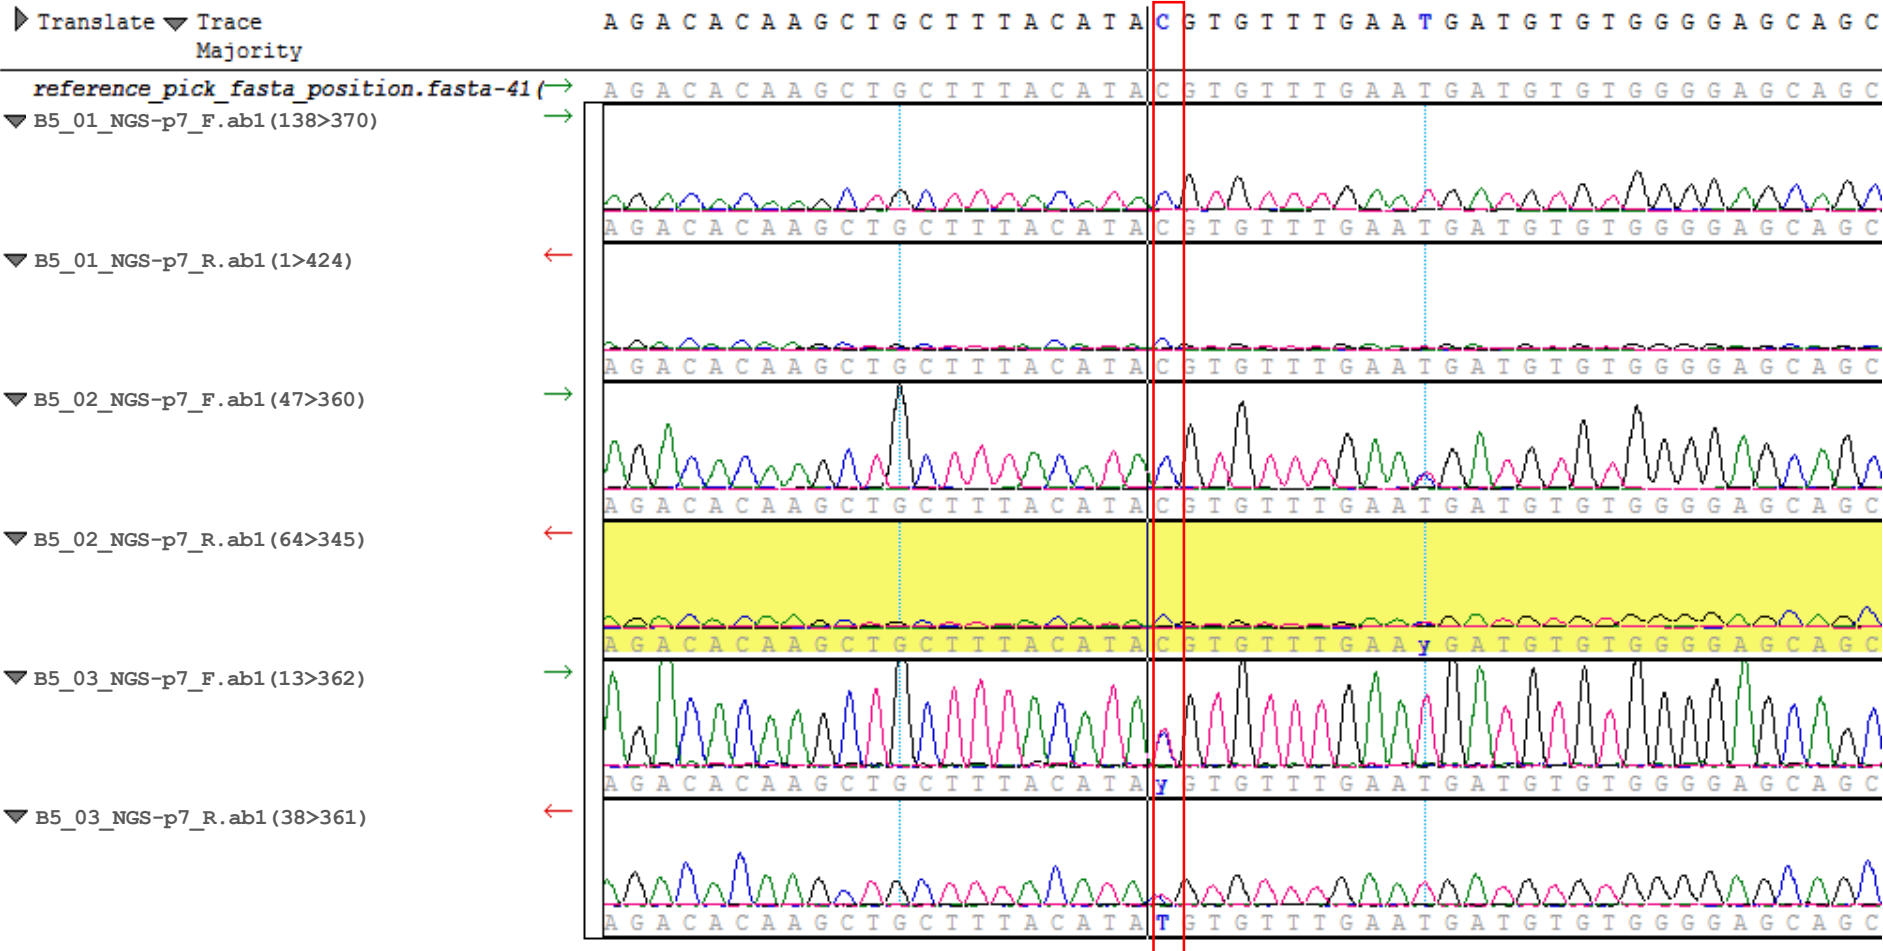

# RNH1

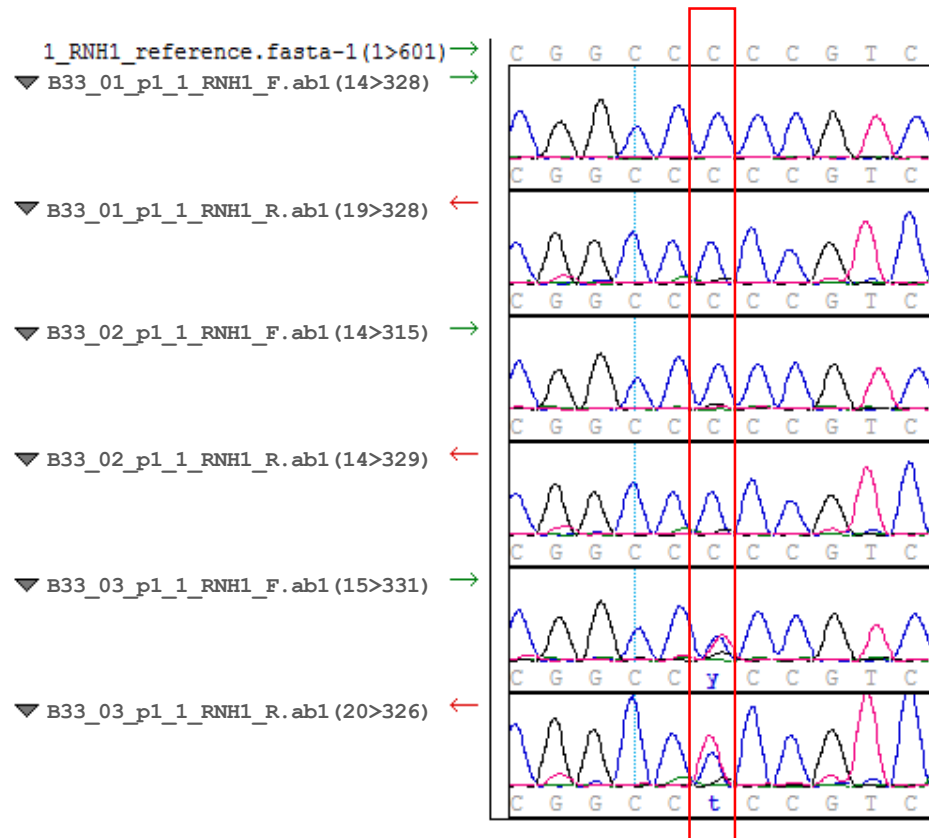

# DTX1

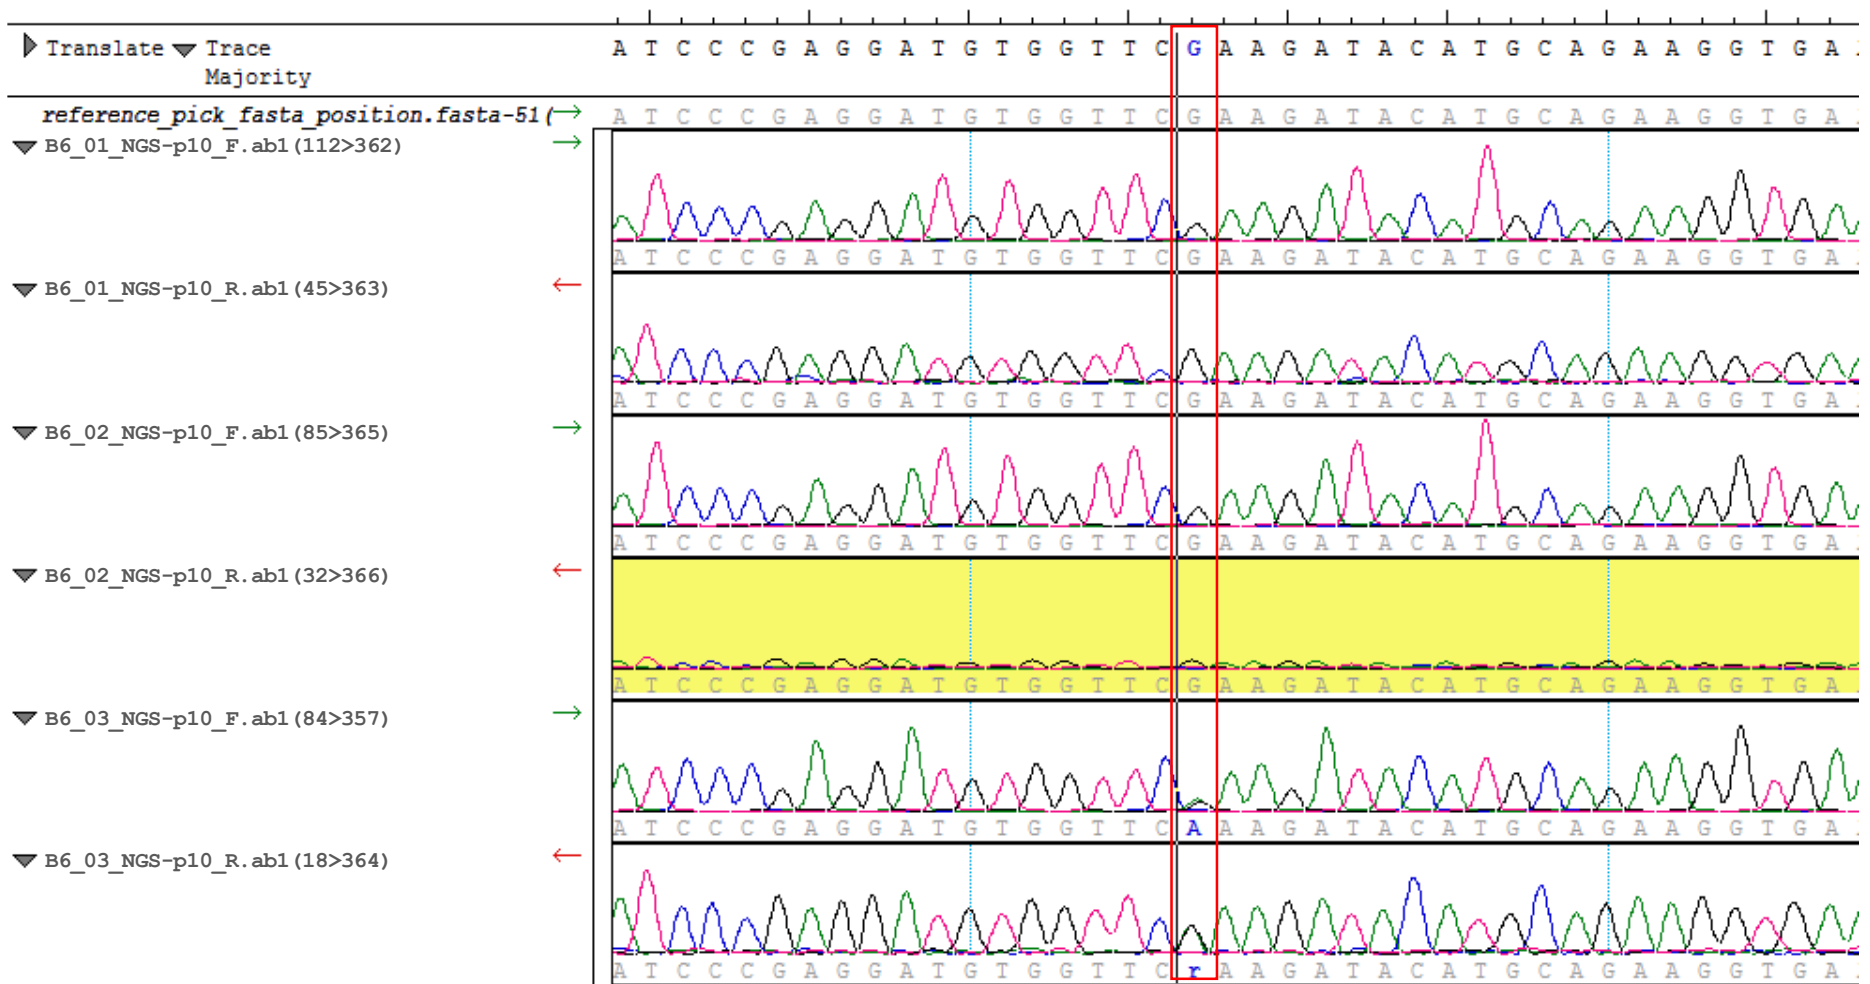

# RASGRP1

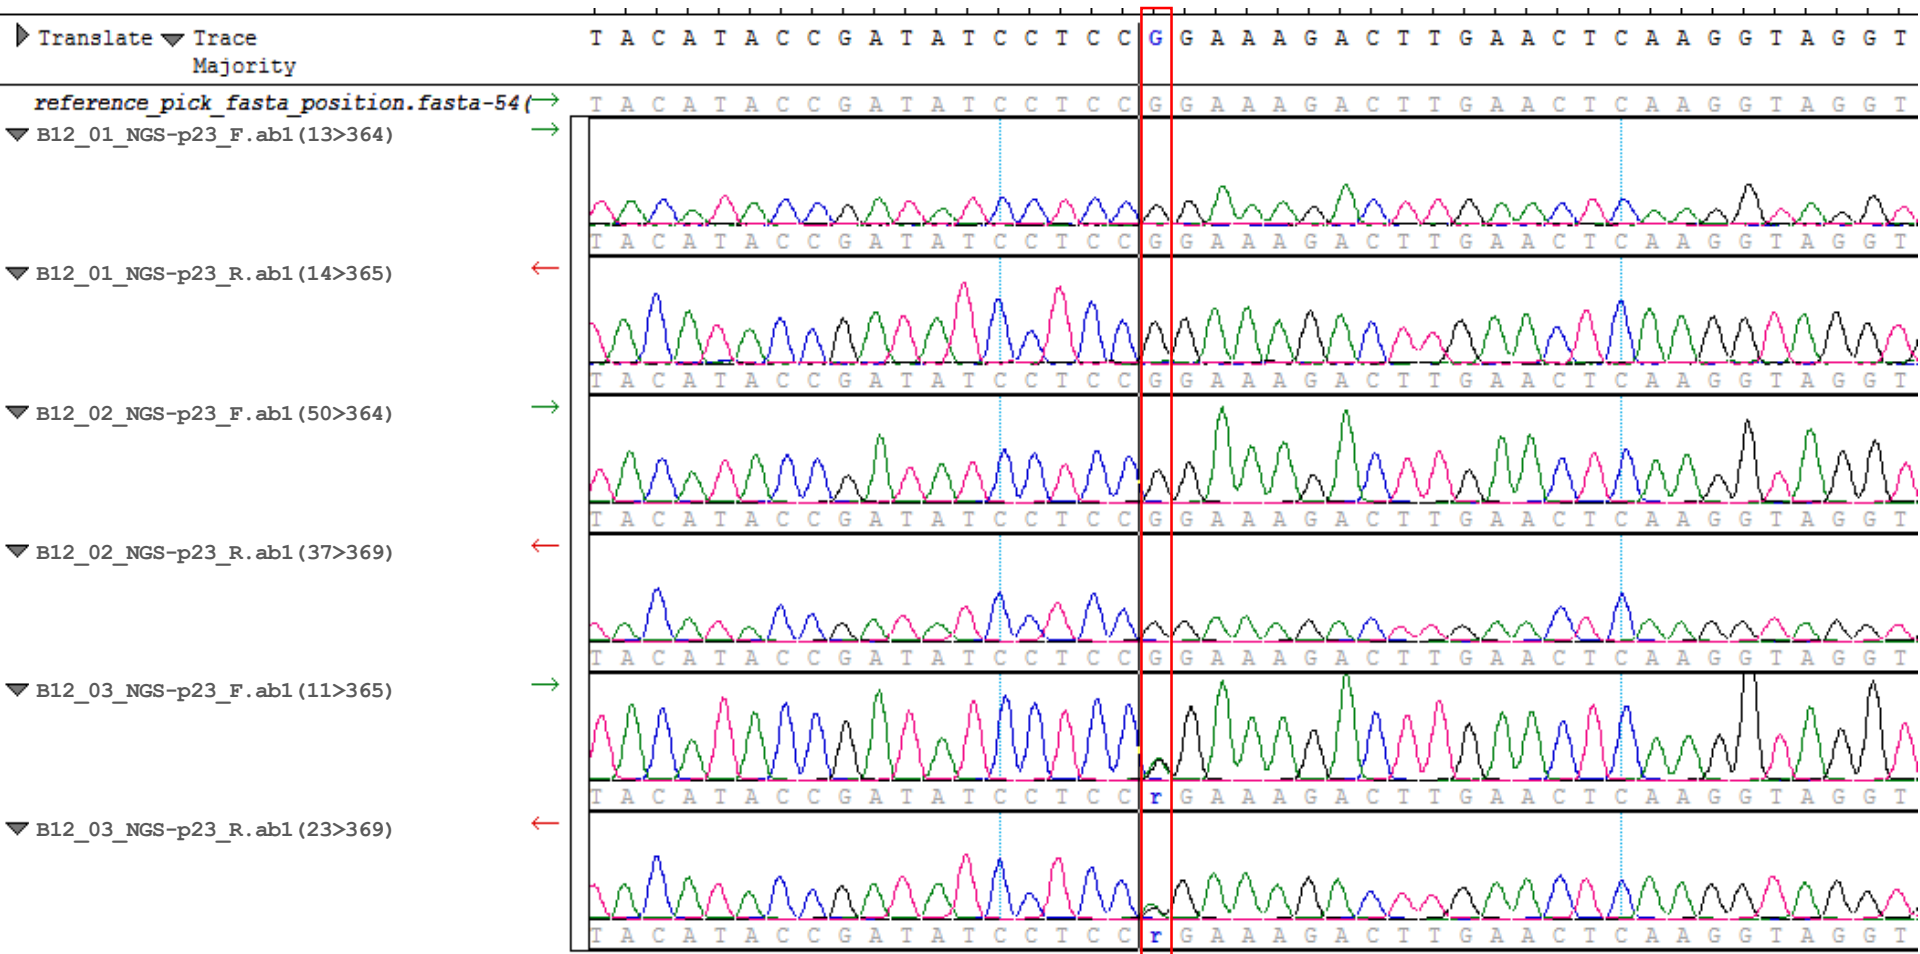

# SYNM

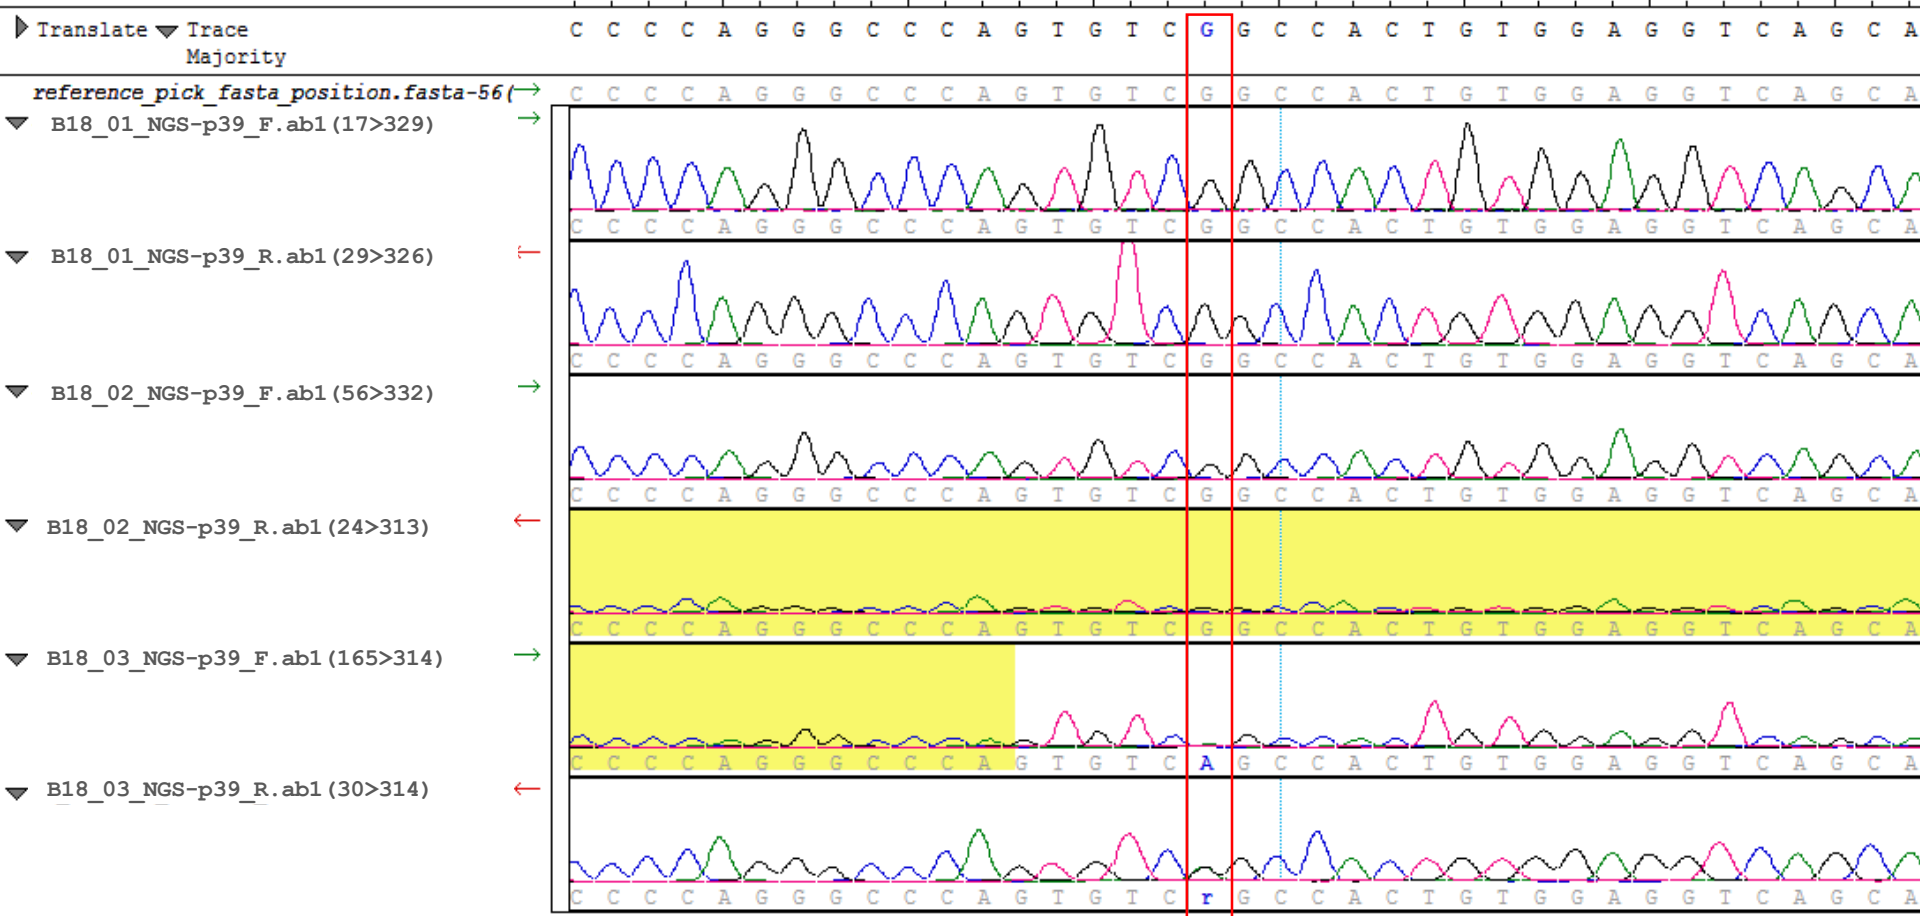

# TMEM8A

► Translate ▼ Trace  
Majority

G T G C A G G C A G C G C C G C T C T C C C G G G A G A C C T G C A G G A G

reference\_pick\_fasta\_position.fasta-57(→

G T G C A G G C A G C G C C G C T C T C C C G G G A G A C C T G C A G G A G

▼ B25\_01\_NGS-p52\_F.ab1 (29>390)

→

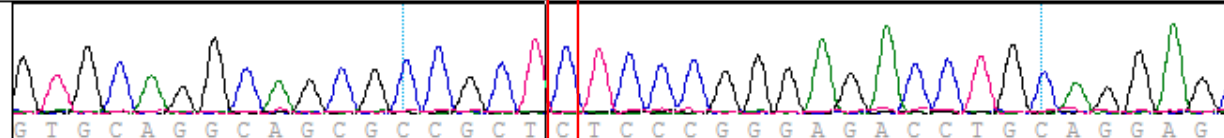

▼ B25\_01\_NGS-p52\_R.ab1 (19>391)

←

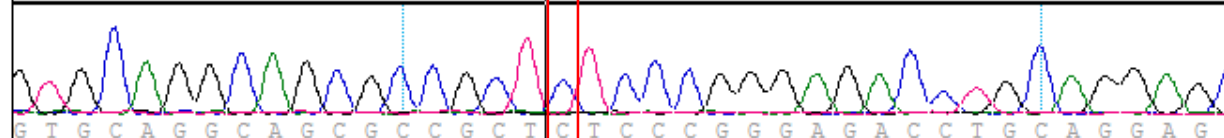

▼ B25\_02\_NGS-p52\_F.ab1 (48>388)

→

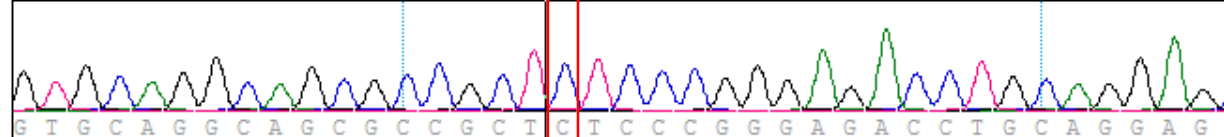

▼ B25\_02\_NGS-p52\_R.ab1 (35>394)

←

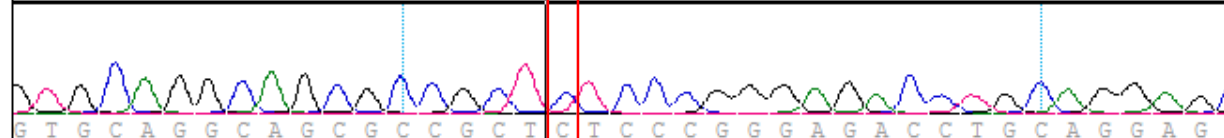

▼ B25\_03\_NGS-p52\_F.ab1 (24>383)

→

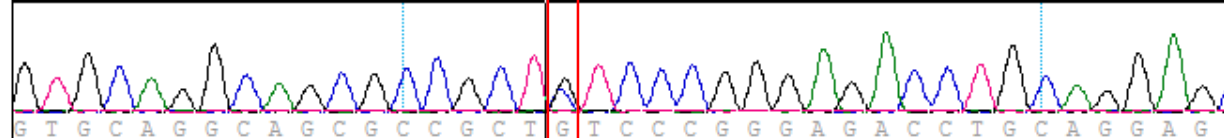

▼ B25\_03\_NGS-p52\_R.ab1 (32>399)

←

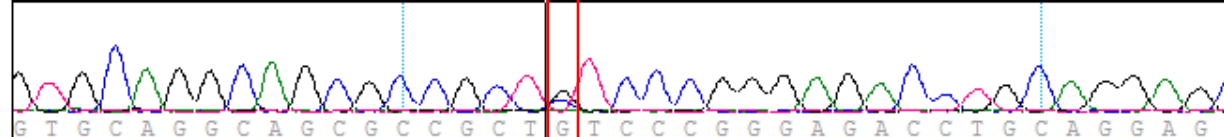



# ADCY7

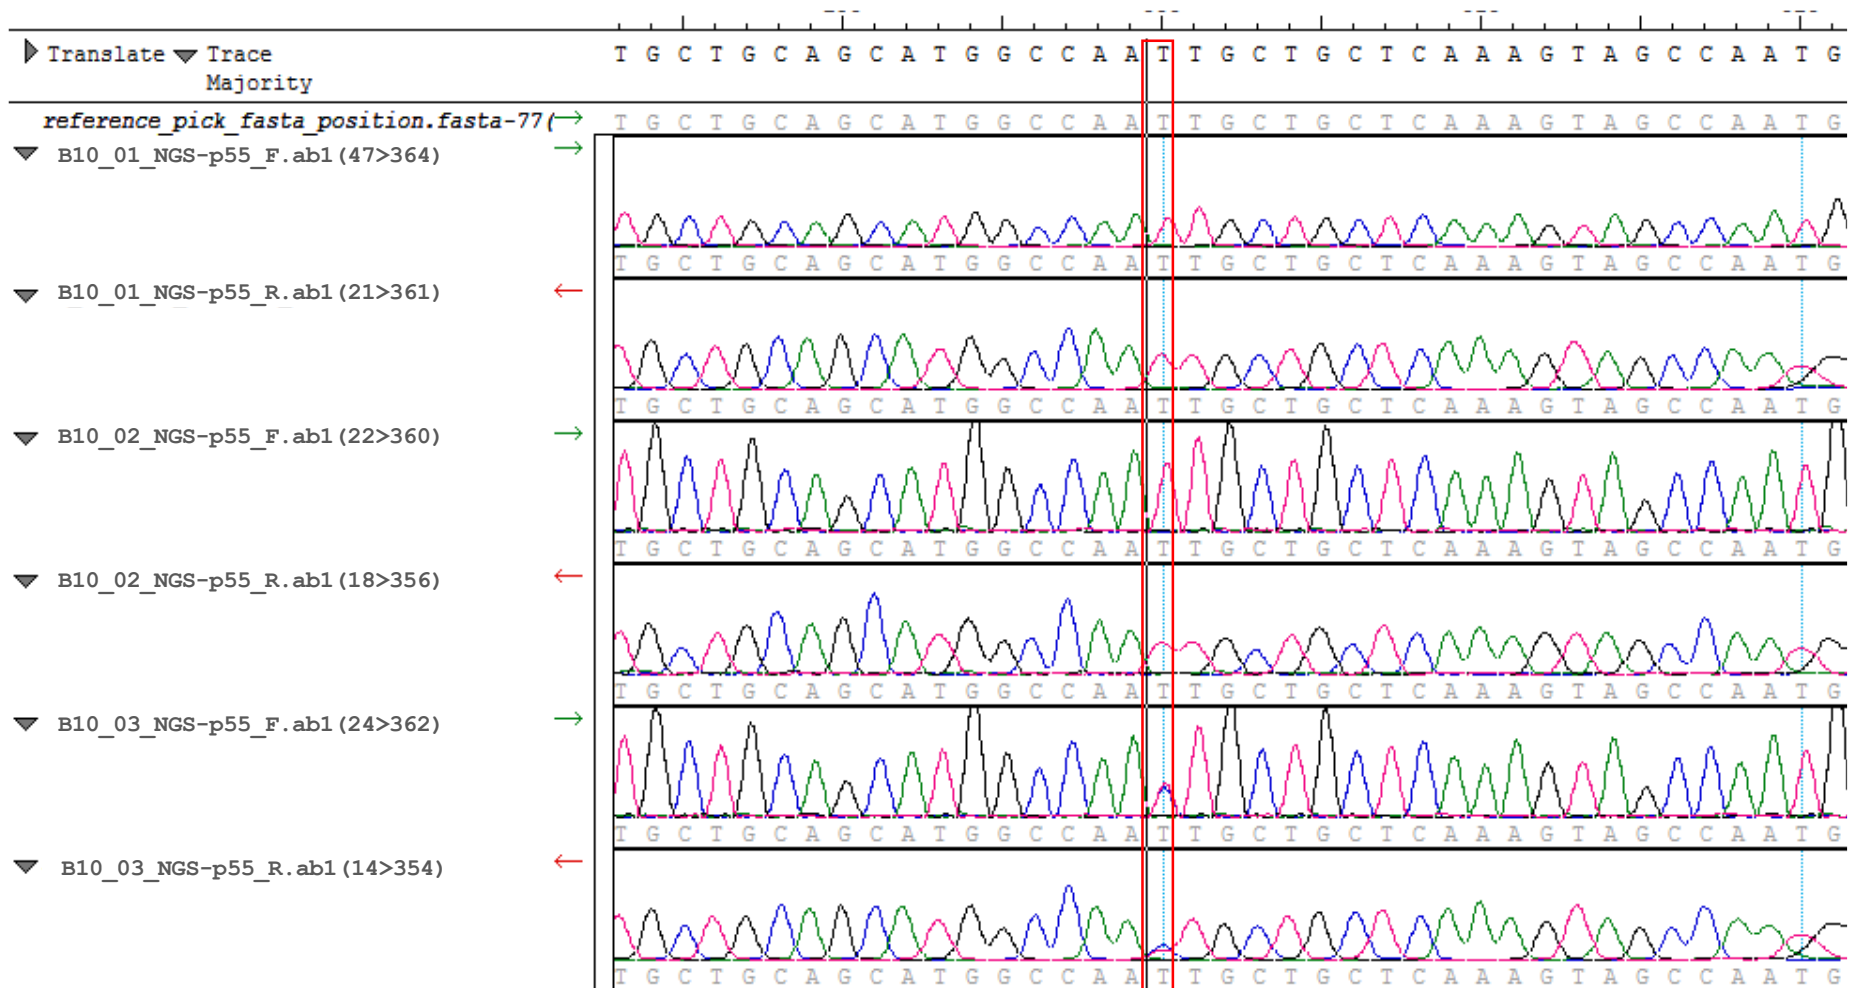

# PIEZO1

## Comment

2\_C2108-03 : heterozygosity (del GCCGTGACTCGGAAACGAGCGGCCA)

2\_C2108-01 : chr16:88804927 : del C (other variant)

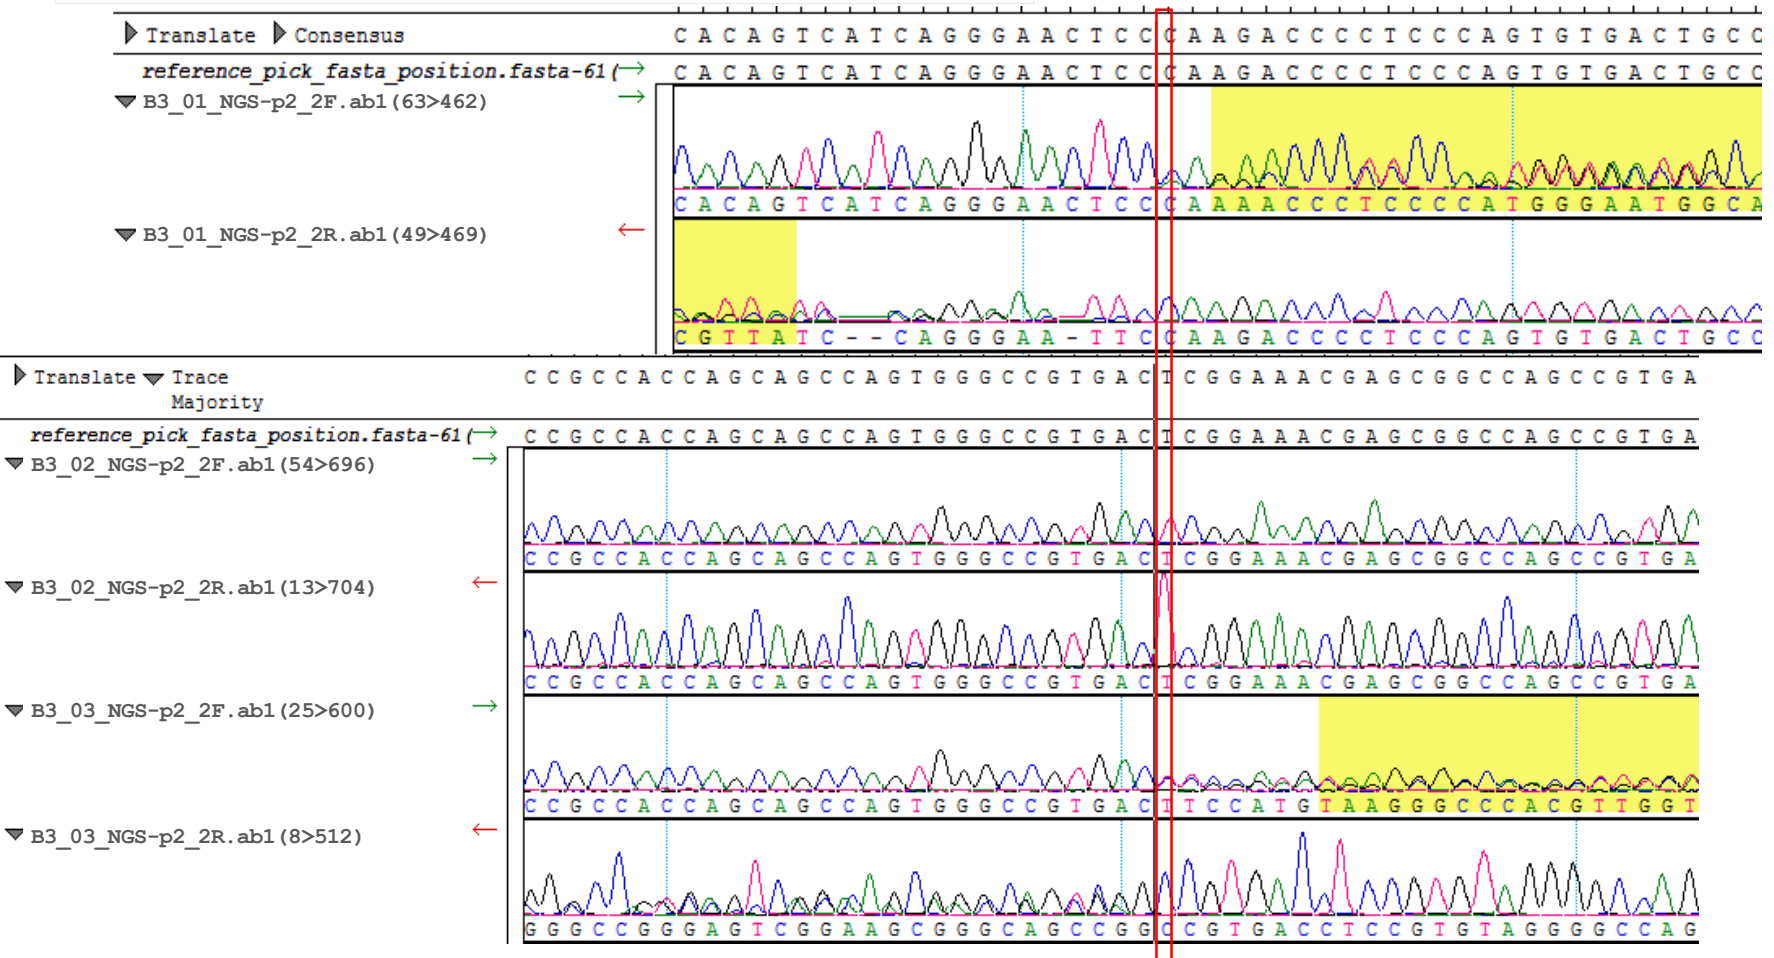

# SNF8

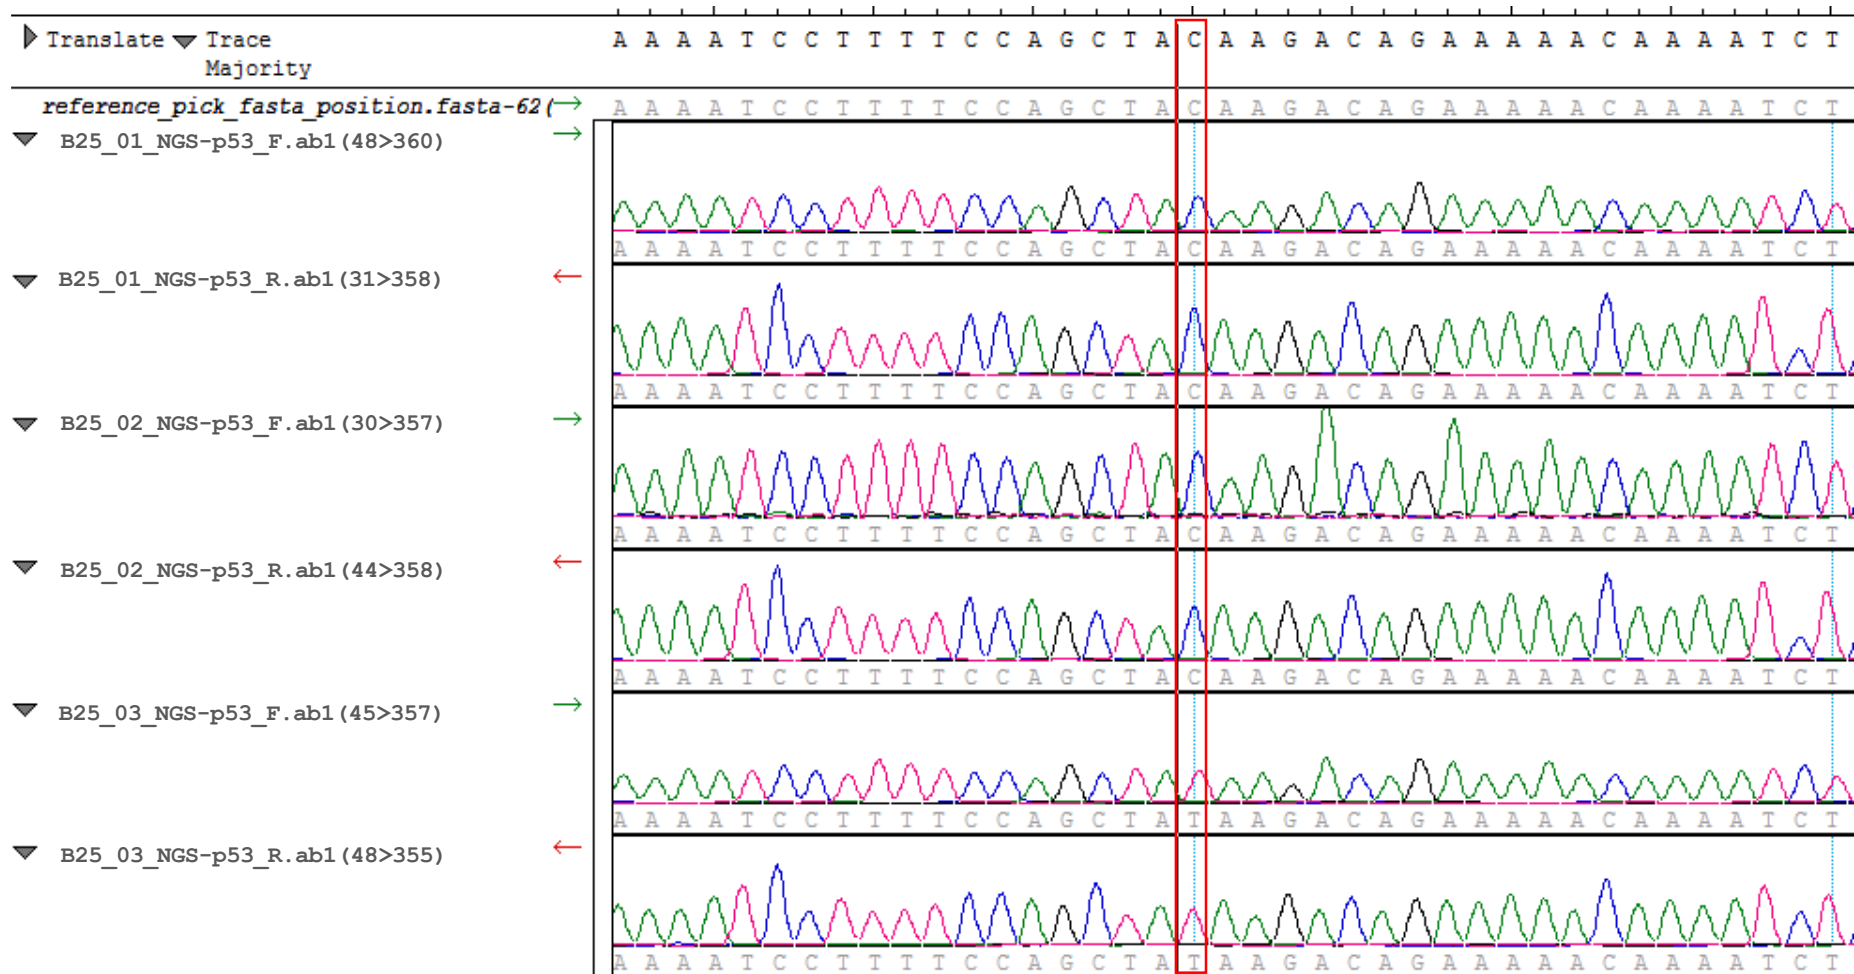

# GMIP

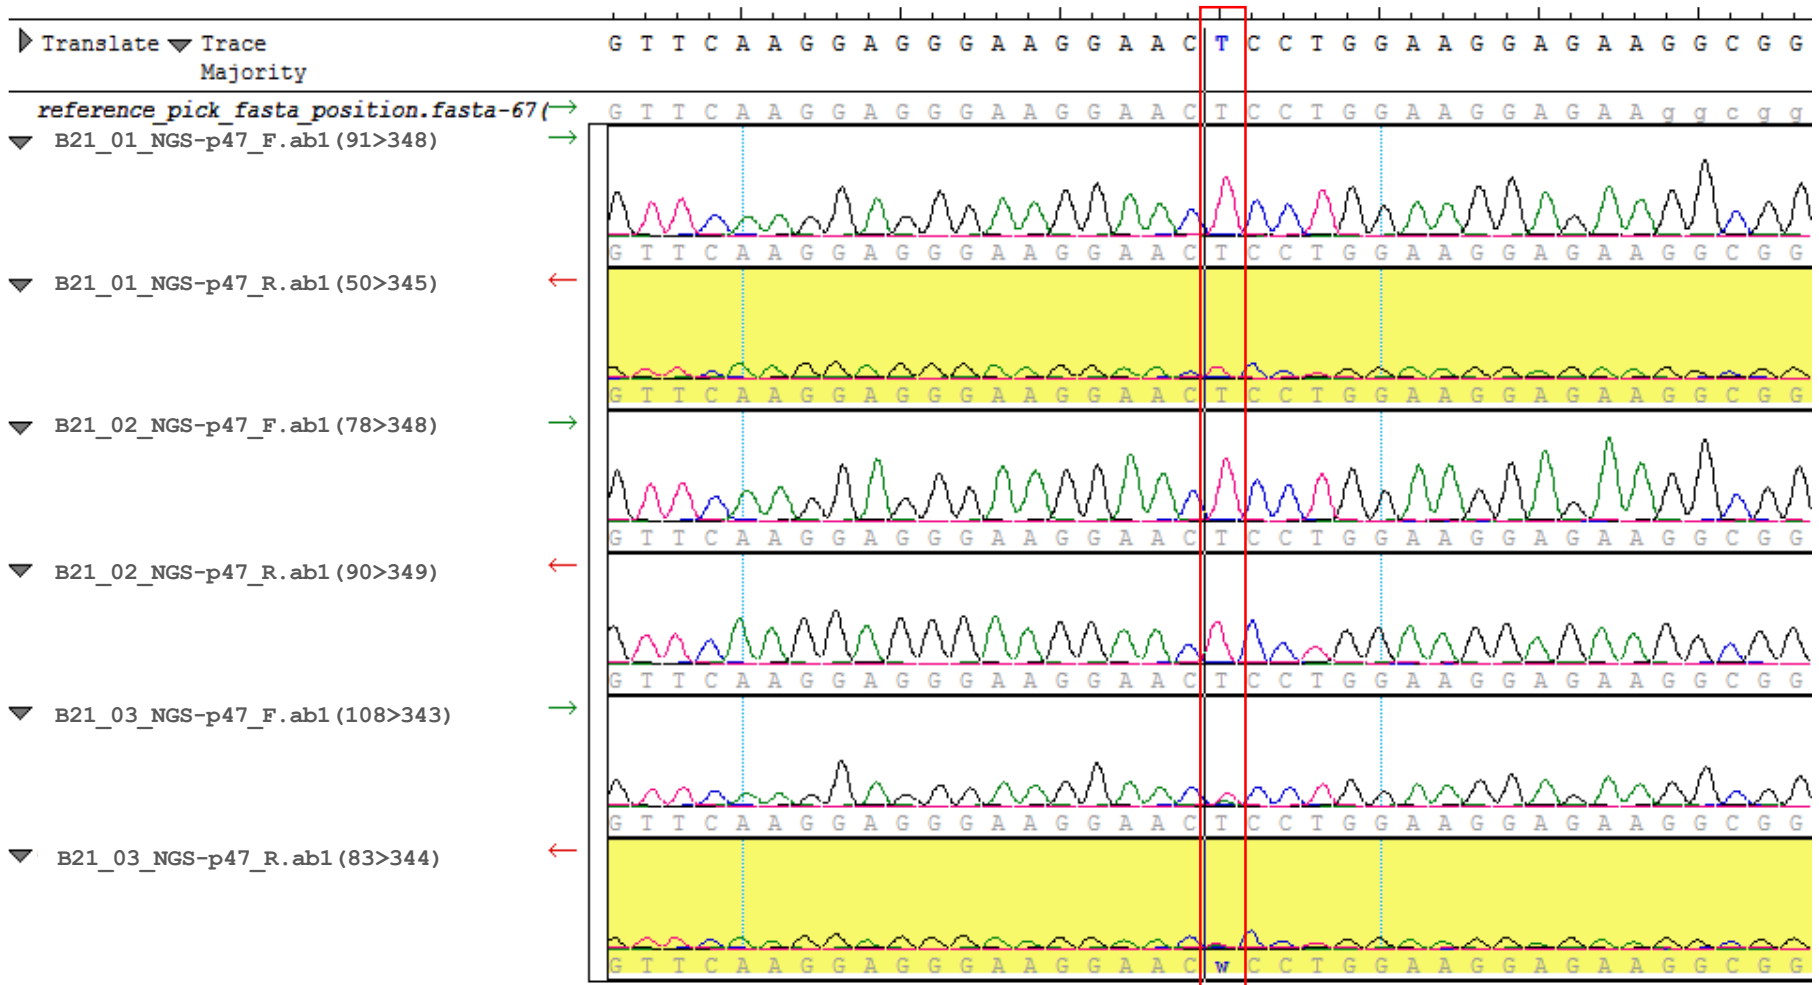

# ANKRD27

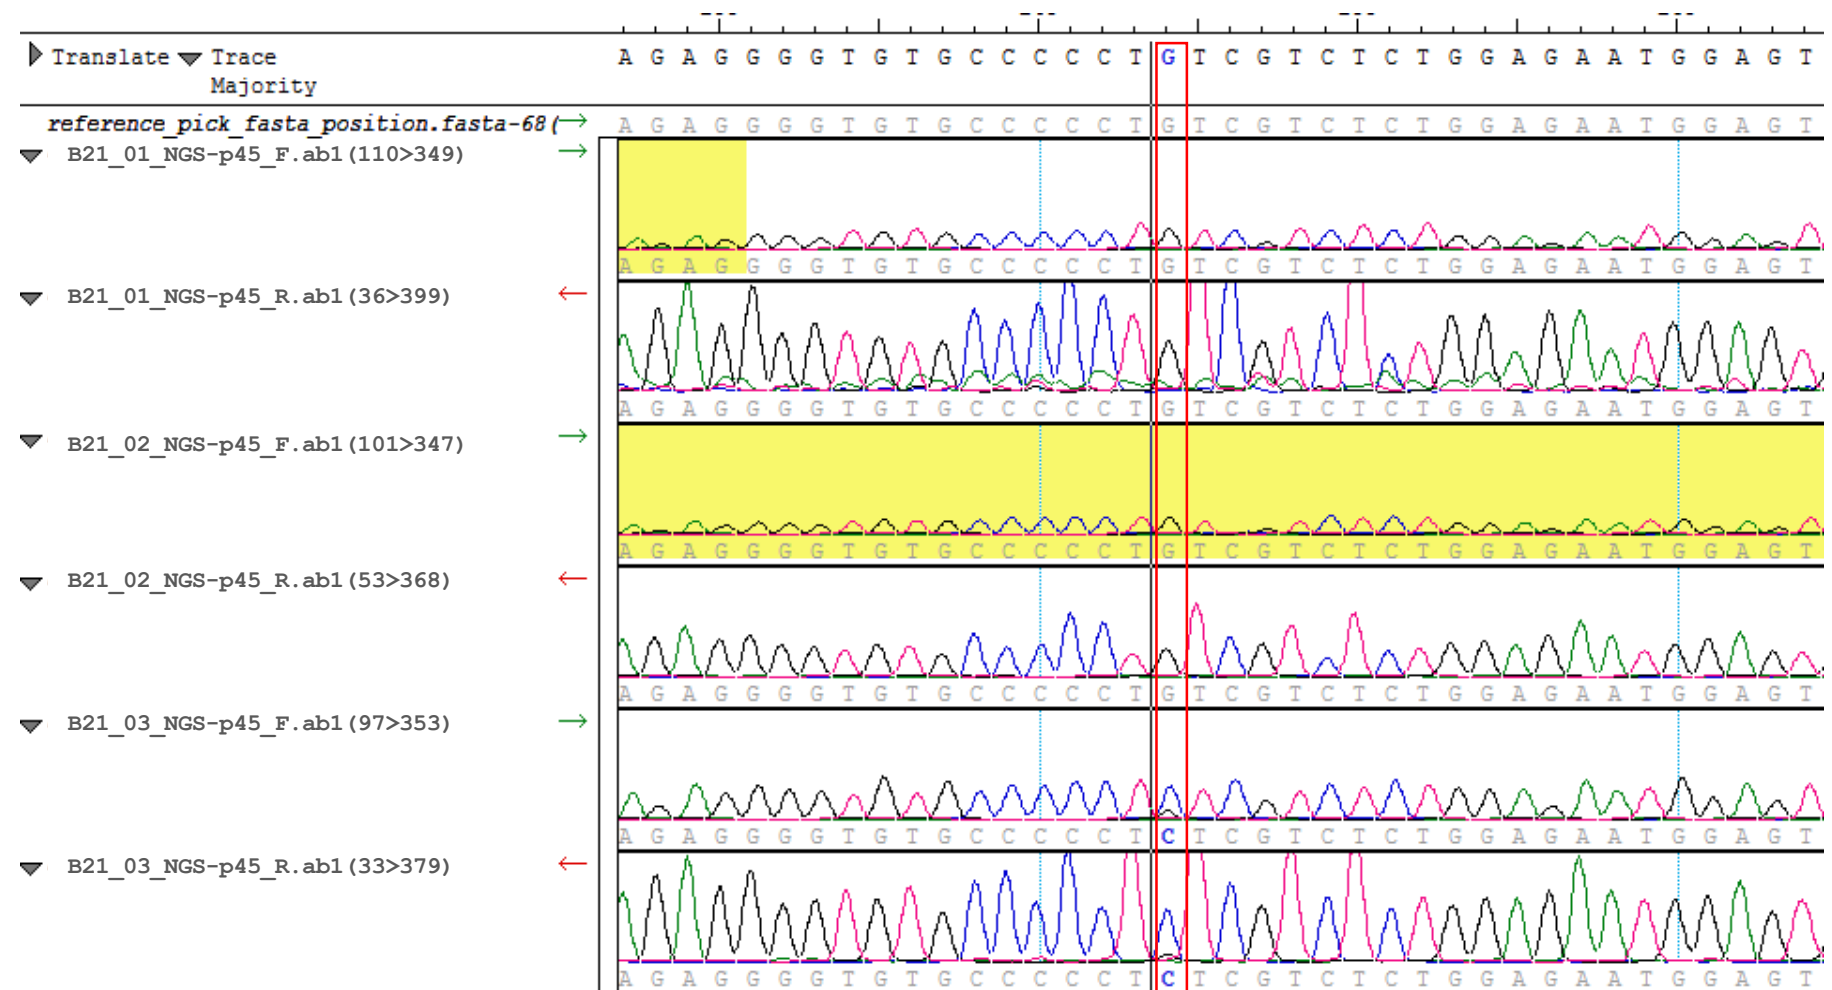

# MYH14

A3\_01

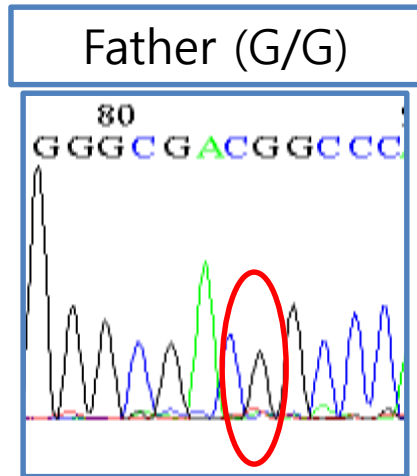

A3\_02

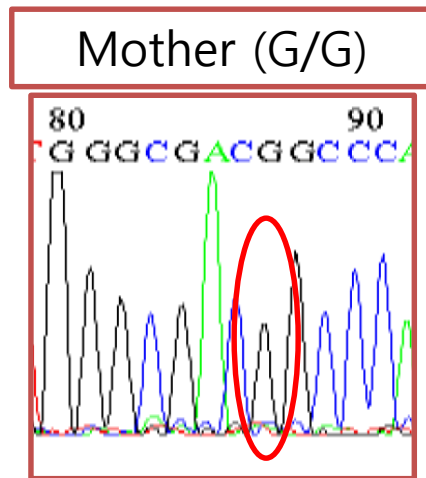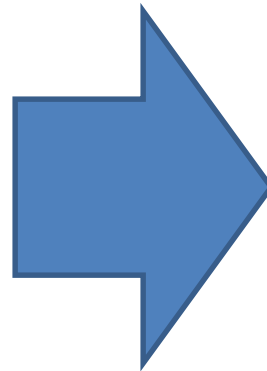

Patient (G/A)

A3\_03

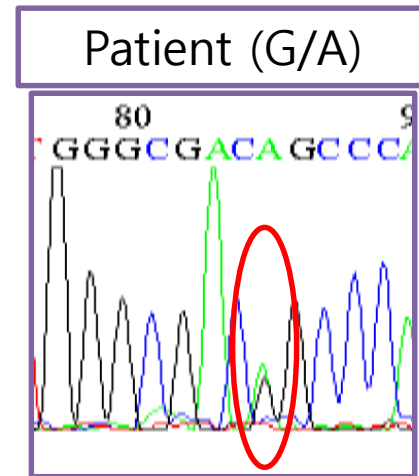

De novo mutation in MYH14 gene

# TFPT

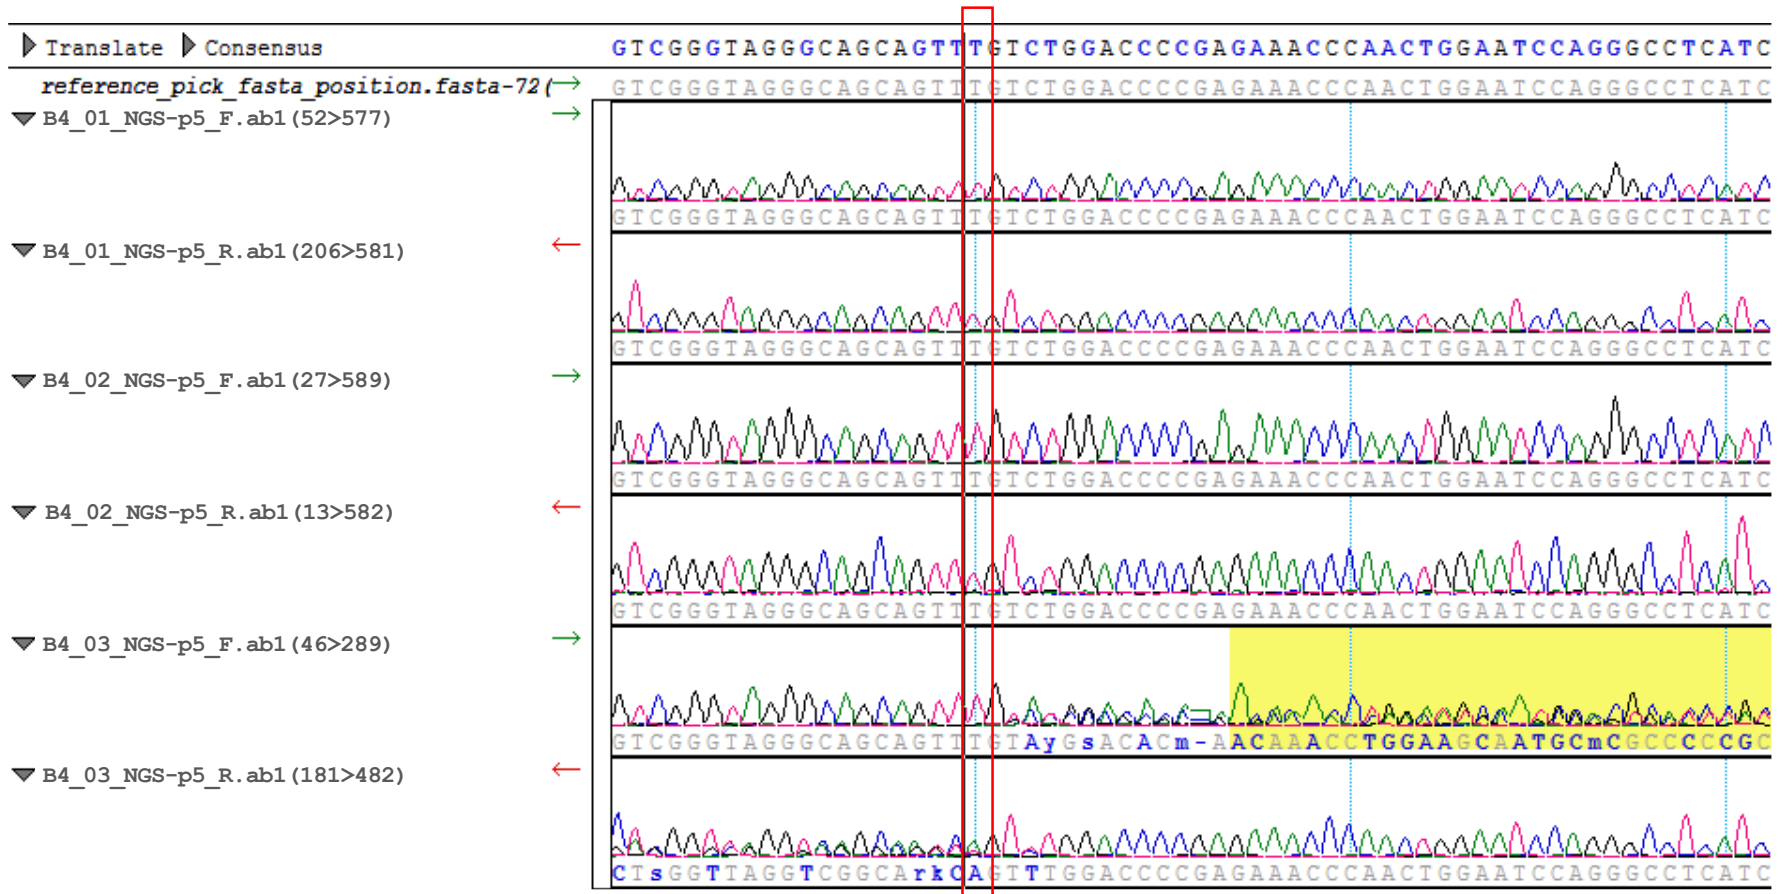

# NOL4L

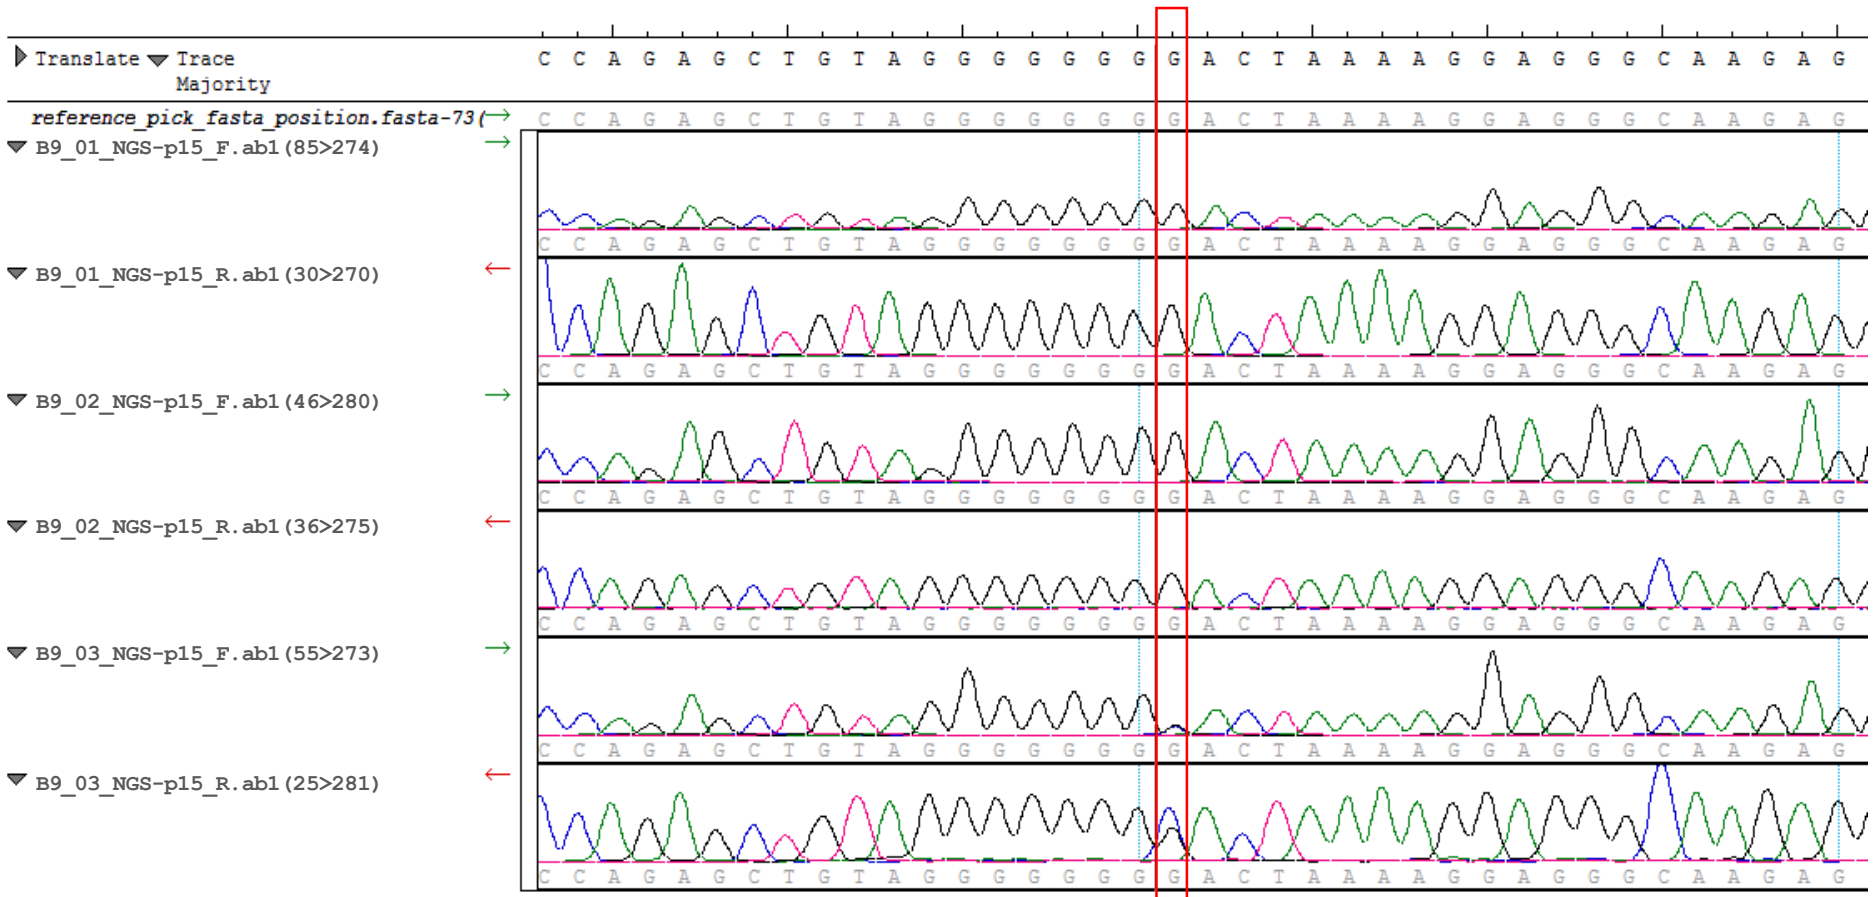



# PPP1R16B

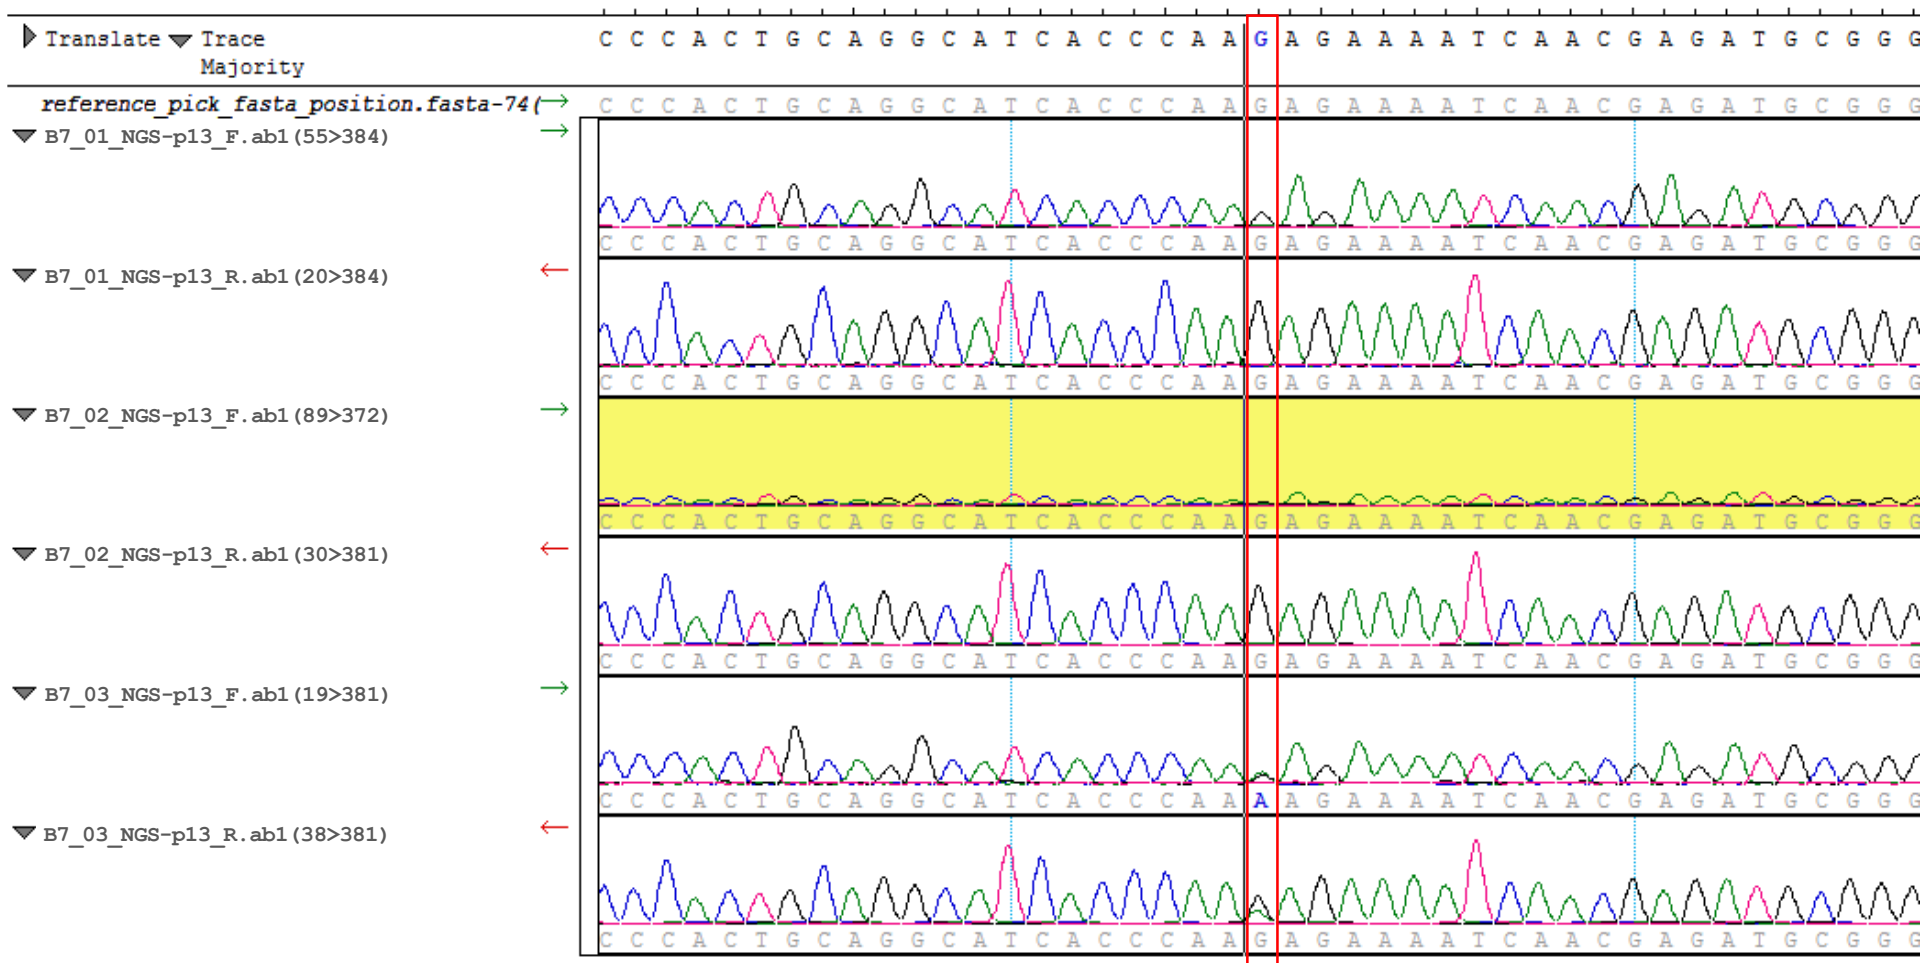

# COL6A2

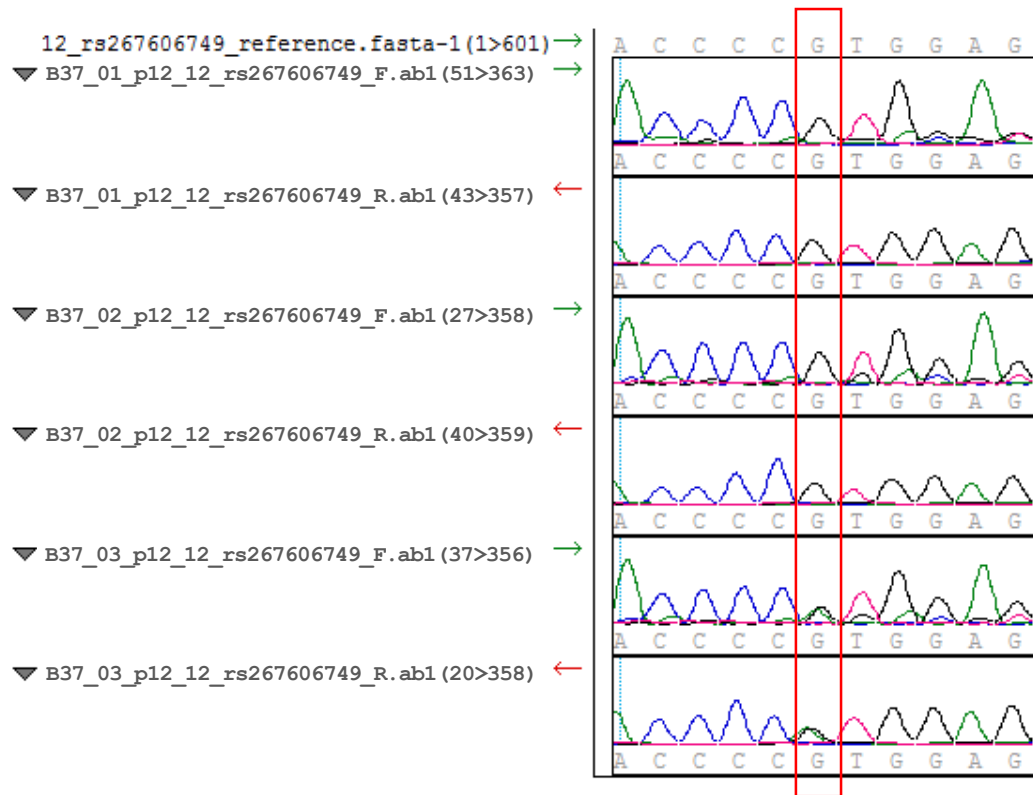

# HMGXB4

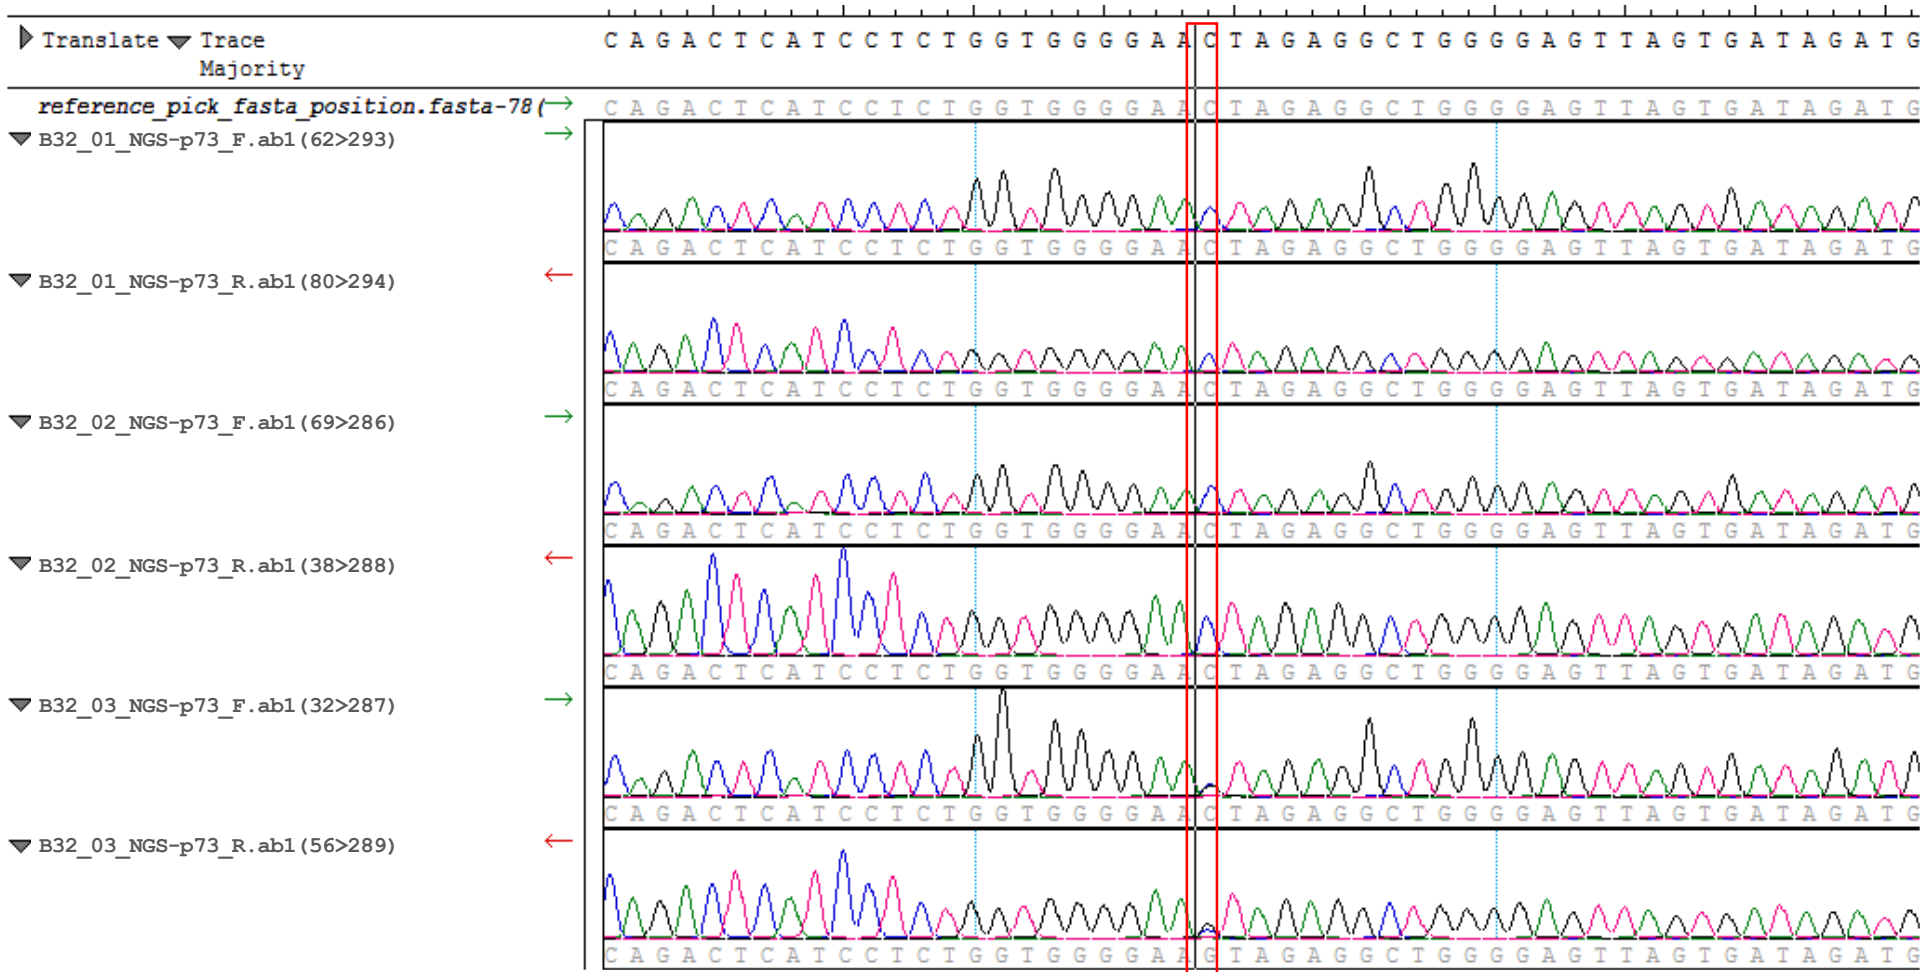

# MT-ND2

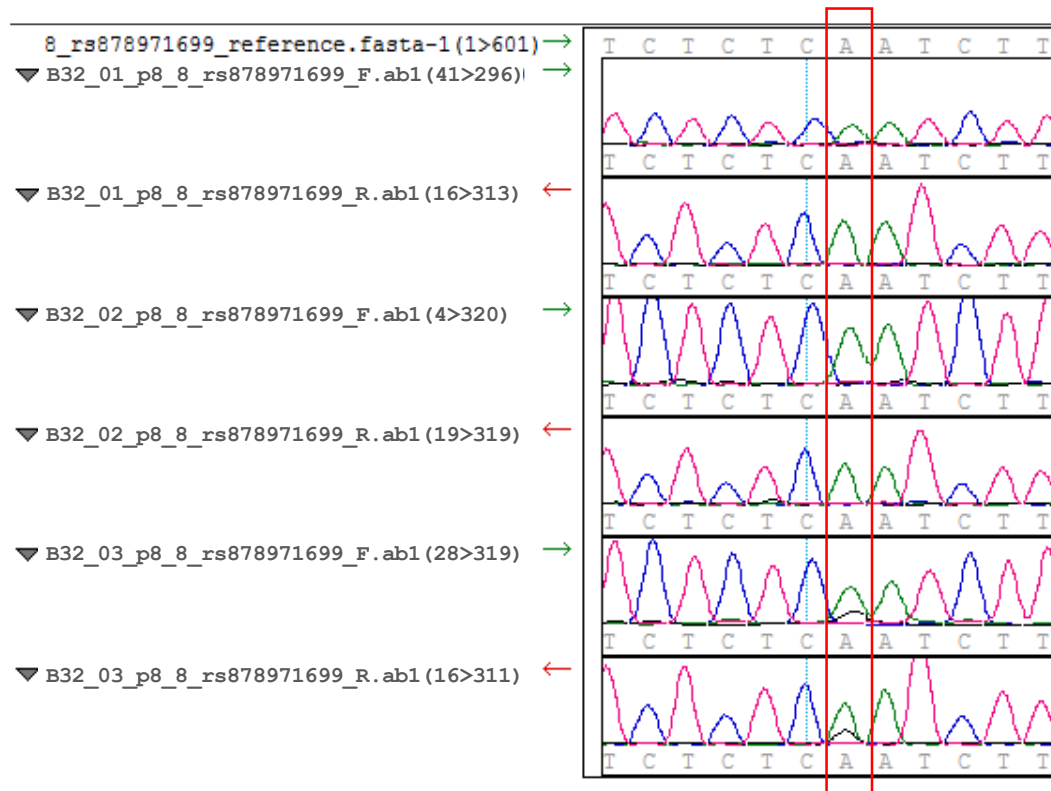

Supplement: s1 [file s1]
